# Supplementary material for: Early life dietary intervention in dairy calves results in a long-term reduction in methane emissions
Source: PubMed Central journal article supplement (PMC7862406; doi:10.1038/s41598-021-82084-9), 2021-02-04
Supplement: 41598_2021_82084_MOESM1_ESM.pdf [file 41598_2021_82084_MOESM1_ESM.pdf]

## **Supplementary Material - Tables**

### **Early life dietary intervention in dairy calves results in a long-term reduction in methane emissions**

**S.J. Meale, M. Popova, C. Saro, C. Martin, A. Bernard, M. Lagree, D.R. Yáñez-Ruiz, H.**

**Boudra, S. Duval, D.P. Morgavi**

**Table S1.** Chemical composition of dietary ingredients fed to all calves (n=18)

|               | Hay   | Starter Concentrate <sup>1</sup> | Concentrate <sup>2</sup> |
|---------------|-------|----------------------------------|--------------------------|
| Dry Matter, % | 92.16 | 91.6                             | 92                       |
| N, % DM       | 1.56  | 2.78                             | 3.00                     |
| NDF, % DM     | 49.89 | 21.27                            | 23.2                     |
| ADF, % DM     | 26.08 | 11.22                            | 13.4                     |
| Starch, % DM  |       | 23.81                            | 27                       |

<sup>1</sup> Starter concentrate available from 4 weeks up to weaning at 11 weeks

<sup>2</sup> Concentrate supplied after weaning. This pelleted concentrate was also used to lure calves to GreenFeeds.

**Table S2.** Sequencing and amplicon size of primers used for MiSeq Illumina sequencing and quantitative PCR.

| Target                  | Primer name | Sequence (5'-3')       | Amplicon size (nt) | Usage      | Reference <sup>1</sup>     |
|-------------------------|-------------|------------------------|--------------------|------------|----------------------------|
| Archaeal 16S rDNA       | Arch349F    | GYGCASCAGKCGMGA AW     | 457                | Sequencing | Takai and Horikoshi (2000) |
|                         | Arch806R    | GGACTACVSGGGTATCTAAT   |                    |            |                            |
| Bacterial V3-5 16S rDNA | V3_F357     | CCTACGGGAGGCAGCAG      | 570                | Sequencing | Muyzer et al. (1993)       |
|                         | V5_R926     | CCGTCAATTCMTTTRAGT     |                    |            |                            |
| Fungal ITS2             | ITS3        | GCATCGATGAAGAACGCAGC   | 330                | Sequencing | White et al. (1990)        |
|                         | ITS4        | TCCTCCGCTTATTGATATGC   |                    |            |                            |
| Protozoal 18S rDNA      | F566Euk     | CAGCAGCCGCGGTAATTCC    | 660                | Sequencing | Hadziavdic et al. (2007)   |
|                         | R1200Euk    | CCCGTGTTGAGTCAAATTAAGC |                    |            |                            |
| Archaeal 16S rDNA       | 1406-1389R  | AGGAATTGGCGGGGAGCAC    | 140                | qPCR       | Denman et al. (2007)       |
|                         | 896-915F    | GAGGAAGGAGTGGACGACGGTA |                    |            |                            |
| Bacterial 16S rDNA      | 520-F       | AGCAGCCGCGGTAAT        | 280                | qPCR       | Edwards et al. (2008)      |
|                         | 799-R       | CAGGGTATCTAATCCTGTT    |                    |            |                            |

<sup>1</sup>Denman, S.E., Tomkins, N.W., and Mcsweeney, C.S. (2007). *FEMS Microbiology Ecology* 62, 313-322.

Edwards, J.E., Huws, S.A., Kim, E.J., and Kingston-Smith, A.H. (2008). *FEMS Microbiology Ecology* 63, 141-142.

Hadziavdic, K., Lekang, K., Lanzen, A., Jonassen, I., Thompson, E.M., and Troedsson, C. (2014). *PLOS ONE* 9, e87624.

Muyzer, G., De Waal, E.C., and Uitterlinden, A.G. (1993). *Applied and Environmental Microbiology* 59, 695-700.

Takai, K., and Horikoshi, K. (2000). *Applied and Environmental Microbiology* 66, 5066-5072.

White TJ, Bruns T, Lee S, Taylor JW: Amplification and direct sequencing of fungal ribosomal RNA genes for phylogenetics. PCR Protocols: A Guide to Methods and Applications. Edited by: Innis MA, Gelfand DH, Sninsky JJ, White TJ. 1990, New York: Academic Press Inc, 315-322.

**Table S3.** Ruminal fermentation parameters in calves supplemented with CONT or 3-NOP up to 60 weeks of age.

| Parameter                  | Week 1 <sup>1</sup> |       | Week 4 <sup>2</sup> |       | Week 11 <sup>3</sup> |       | Week 14 <sup>2</sup> |       | Week 23 <sup>4</sup> |       | Week 60 <sup>3</sup> |        | SE    | P-values |        |          |
|----------------------------|---------------------|-------|---------------------|-------|----------------------|-------|----------------------|-------|----------------------|-------|----------------------|--------|-------|----------|--------|----------|
|                            | CONT                | 3NOP  | CONT                | 3NOP  | CONT                 | 3NOP  | CONT                 | 3NOP  | CONT                 | 3NOP  | CONT                 | 3NOP   |       | TRT      | Week   | TRT*Week |
| Total VFA, mmol/L          | 19.57               | 20.13 | 60.04               | 48.65 | 84.53                | 87.77 | 114.01               | 92.44 | 70.95                | 98.43 | 96.87                | 120.78 | 4.275 | 0.77     | <0.001 | 0.22     |
| Individual VFA, % of total |                     |       |                     |       |                      |       |                      |       |                      |       |                      |        |       |          |        |          |
| Acetate (A)                | 82.11               | 78.81 | 77.35               | 80.24 | 72.98                | 62.97 | 69.08                | 70.60 | 65.90                | 68.52 | 73.94                | 72.41  | 2.973 | 0.88     | <0.001 | 0.19     |
| Propionate (P)             | 14.21               | 17.30 | 11.50               | 11.93 | 15.61                | 17.77 | 19.68                | 15.14 | 20.65                | 18.74 | 14.38                | 14.99  | 0.862 | 0.43     | <0.001 | 0.29     |
| Butyrate                   | 2.28                | 2.26  | 8.59                | 5.89  | 9.49                 | 15.82 | 8.95                 | 11.23 | 10.53                | 10.12 | 10.20                | 11.05  | 0.610 | 0.20     | <0.001 | 0.30     |
| Isovalerate                | 0.94                | 1.09  | 1.33                | 1.20  | 0.70                 | 1.56  | 0.70                 | 1.04  | 1.07                 | 1.01  | 0.43                 | 0.43   | 0.055 | 0.12     | 0.013  | 0.28     |
| Valerate                   | 0.38                | 0.39  | 1.05                | 0.65  | 0.92                 | 1.42  | 0.92                 | 1.21  | 0.72                 | 0.65  | 0.45                 | 0.49   | 0.060 | 0.54     | 0.011  | 0.39     |
| Caproate                   | 0.09                | 0.15  | 0.19                | 0.09  | 0.18                 | 0.37  | 0.18                 | 0.19  | 0.26                 | 0.18  | 0.13                 | 0.13   | 0.015 | 0.44     | 0.003  | 0.70     |
| A:P ratio                  | 6.16                | 4.96  | 6.16                | 5.91  | 4.05                 | 3.84  | 3.60                 | 3.52  | 4.56                 | 5.20  | 5.16                 | 4.84   | 0.196 | 0.39     | 0.008  | 0.27     |
| NH <sub>3</sub> , mM       | 2.54                | 2.23  | 14.60               | 12.15 | 1.28                 | 1.31  | 2.28                 | 2.16  | 4.32                 | 3.06  | 1.44                 | 1.43   | 0.470 | 0.51     | 0.003  | 0.44     |

<sup>1</sup> n=6 in CONT; n=9 in 3-NOP<sup>2</sup> n=8 in CONT; n=10 in 3-NOP<sup>3</sup> n=8 in CONT; n=9 in 3-NOP<sup>4</sup> n=7 in CONT; n=10 in 3-NOP

**Table S4.** Ruminal alpha diversity metrics in calves supplemented with CONT or 3-NOP up to 60 week of age.

|                        | Week 1 <sup>1</sup> |      |       |         | Week 4 <sup>2</sup> |      |       |         | Week 11 <sup>3</sup> |      |       |         | Week 14 <sup>2</sup> |      |       |         | Week 23 <sup>4</sup> |      |       |         | Week 60 <sup>3</sup> |      |       |         |
|------------------------|---------------------|------|-------|---------|---------------------|------|-------|---------|----------------------|------|-------|---------|----------------------|------|-------|---------|----------------------|------|-------|---------|----------------------|------|-------|---------|
|                        | 3NOP                | CONT | SEM   | P-value | 3NOP                | CONT | SEM   | P-value | 3NOP                 | CONT | SEM   | P-value | 3NOP                 | CONT | SEM   | P-value | 3NOP                 | CONT | SEM   | P-value | 3NOP                 | CONT | SEM   | P-value |
| <b>Bacteria</b>        |                     |      |       |         |                     |      |       |         |                      |      |       |         |                      |      |       |         |                      |      |       |         |                      |      |       |         |
| Shannon                | 2.41                | 2.51 | 0.126 | 0.643   | 3.34                | 3.70 | 0.144 | 0.171   | 4.46                 | 4.62 | 0.072 | 0.102   | 4.42                 | 4.84 | 0.102 | 0.031   | 4.69                 | 4.76 | 0.075 | 0.847   | 4.03                 | 4.46 | 0.129 | 0.124   |
| Simpson                | 0.75                | 0.81 | 0.034 | 0.728   | 0.86                | 0.89 | 0.025 | 0.233   | 0.95                 | 0.96 | 0.005 | 0.178   | 0.95                 | 0.97 | 0.006 | 0.019   | 0.96                 | 0.97 | 0.004 | 1.000   | 0.91                 | 0.93 | 0.010 | 0.441   |
| Richness               | 171                 | 161  | 9.2   | 0.418   | 406                 | 483  | 24.7  | 0.102   | 631                  | 641  | 16.1  | 0.386   | 667                  | 709  | 15.0  | 0.085   | 732                  | 728  | 14.6  | 0.700   | 590                  | 669  | 18.2  | 0.021   |
| Evenness               | 0.47                | 0.50 | 0.024 | 0.817   | 0.56                | 0.60 | 0.023 | 0.200   | 0.69                 | 0.72 | 0.011 | 0.178   | 0.68                 | 0.74 | 0.014 | 0.031   | 0.71                 | 0.72 | 0.011 | 0.923   | 0.63                 | 0.68 | 0.017 | 0.248   |
| <b>Archaea</b>         |                     |      |       |         |                     |      |       |         |                      |      |       |         |                      |      |       |         |                      |      |       |         |                      |      |       |         |
| Shannon                | 0.40                | 0.50 | 0.133 | 0.754   | 2.28                | 2.69 | 0.082 | 0.015   | 2.99                 | 2.93 | 0.074 | 0.700   | 2.95                 | 2.98 | 0.058 | 0.825   | 3.10                 | 3.26 | 0.046 | 0.178   | 3.64                 | 3.60 | 0.031 | 0.630   |
| Simpson                | 0.84                | 0.70 | 0.066 | 0.286   | 0.80                | 0.87 | 0.016 | 0.058   | 0.89                 | 0.88 | 0.012 | 1.000   | 0.89                 | 0.91 | 0.006 | 0.122   | 0.90                 | 0.92 | 0.007 | 0.211   | 0.94                 | 0.93 | 0.003 | 0.178   |
| Richness               | 10                  | 18   | 4.9   | 0.450   | 240                 | 312  | 15.9  | 0.022   | 329                  | 311  | 22.2  | 0.736   | 297                  | 251  | 19.4  | 0.270   | 345                  | 400  | 13.5  | 0.030   | 424                  | 476  | 14.1  | 0.083   |
| Evenness               | 0.14                | 0.23 | 0.063 | 0.490   | 0.42                | 0.47 | 0.012 | 0.070   | 0.52                 | 0.51 | 0.009 | 1.000   | 0.52                 | 0.54 | 0.008 | 0.038   | 0.53                 | 0.54 | 0.007 | 0.564   | 0.60                 | 0.58 | 0.004 | 0.083   |
| <b>Anaerobic fungi</b> |                     |      |       |         |                     |      |       |         |                      |      |       |         |                      |      |       |         |                      |      |       |         |                      |      |       |         |
| Shannon                |                     |      |       |         | 2.59                | 2.57 | 0.084 | 0.508   | 4.44                 | 4.17 | 0.095 | 0.178   | 3.97                 | 3.84 | 0.186 | 0.508   | 4.30                 | 4.35 | 0.105 | 0.700   | 4.73                 | 4.89 | 0.129 | 0.847   |
| Simpson                |                     |      |       |         | 0.72                | 0.73 | 0.005 | 0.965   | 0.95                 | 0.94 | 0.006 | 0.211   | 0.91                 | 0.89 | 0.021 | 0.310   | 0.96                 | 0.96 | 0.005 | 0.847   | 0.97                 | 0.98 | 0.004 | 0.248   |
| Richness               |                     |      |       |         | 524                 | 439  | 67.2  | 0.566   | 723                  | 433  | 77.1  | 0.068   | 560                  | 573  | 60.5  | 0.895   | 691                  | 600  | 65.1  | 0.847   | 735                  | 699  | 68.6  | 0.773   |
| Evenness               |                     |      |       |         | 0.43                | 0.44 | 0.011 | 0.825   | 0.70                 | 0.70 | 0.012 | 0.441   | 0.64                 | 0.61 | 0.017 | 0.354   | 0.66                 | 0.69 | 0.010 | 0.290   | 0.73                 | 0.76 | 0.008 | 0.102   |
| <b>Protozoa</b>        |                     |      |       |         |                     |      |       |         |                      |      |       |         |                      |      |       |         |                      |      |       |         |                      |      |       |         |
| Shannon                |                     |      |       |         |                     |      |       |         |                      |      |       |         |                      |      |       |         | 0.44                 | 0.77 | 0.227 | 0.17    | 2.53                 | 2.47 | 0.055 | 0.32    |
| Simpson                |                     |      |       |         |                     |      |       |         |                      |      |       |         |                      |      |       |         | 0.18                 | 0.32 | 0.102 | 0.19    | 0.88                 | 0.87 | 0.011 | 0.24    |
| Richness               |                     |      |       |         |                     |      |       |         |                      |      |       |         |                      |      |       |         | 15                   | 21   | 4.5   | 0.23    | 41                   | 42   | 1.2   | 0.64    |
| Evenness               |                     |      |       |         |                     |      |       |         |                      |      |       |         |                      |      |       |         | 0.16                 | 0.24 | 0.061 | 0.23    | 0.68                 | 0.66 | 0.015 | 0.24    |

<sup>1</sup> n=6 in CONT; n=9 in 3-NOP

<sup>2</sup> n=8 in CONT; n=10 in 3-NOP

<sup>3</sup> n=8 in CONT; n=9 in 3-NOP

<sup>4</sup> n=7 in CONT; n=10 in 3-NOP

**Table S5.** Faecal alpha diversity metrics in calves supplemented with CONT or 3NOP up to 60 week of age.

|                        | Week 1 <sup>1</sup> |      |       |         | Week 4 <sup>2</sup> |      |       |         | Week 11 <sup>2</sup> |      |       |         | Week 14 <sup>3</sup> |      |       |         | Week 23 <sup>4</sup> |      |       |         | Week 60 <sup>2</sup> |      |       |         |
|------------------------|---------------------|------|-------|---------|---------------------|------|-------|---------|----------------------|------|-------|---------|----------------------|------|-------|---------|----------------------|------|-------|---------|----------------------|------|-------|---------|
|                        | 3NOP                | CONT | SEM   | P-value | 3NOP                | CONT | SEM   | P-value | 3NOP                 | CONT | SEM   | P-value | 3NOP                 | CONT | SEM   | P-value | 3NOP                 | CONT | SEM   | P-value | 3NOP                 | CONT | SEM   | P-value |
| <b>Bacteria</b>        |                     |      |       |         |                     |      |       |         |                      |      |       |         |                      |      |       |         |                      |      |       |         |                      |      |       |         |
| Shannon                | 2.96                | 3.01 | 0.097 | 1.000   | 4.21                | 4.11 | 0.094 | 0.56    | 4.25                 | 4.11 | 0.067 | 0.42    | 4.68                 | 4.71 | 0.029 | 0.57    | 4.53                 | 4.42 | 0.038 | 0.18    | 2.96                 | 3.01 | 0.097 | 1       |
| Simpson                | 0.87                | 0.86 | 0.016 | 0.441   | 0.95                | 0.94 | 0.007 | 0.70    | 0.95                 | 0.94 | 0.005 | 0.91    | 0.97                 | 0.97 | 0.002 | 0.45    | 0.96                 | 0.95 | 0.002 | 0.054   | 0.87                 | 0.86 | 0.016 | 0.44    |
| Richness               | 239                 | 257  | 14.9  | 0.386   | 490                 | 494  | 11.6  | 0.56    | 527                  | 525  | 13.8  | 1       | 563                  | 555  | 10.9  | 0.76    | 456                  | 463  | 6.8   | 0.50    | 239                  | 257  | 14.9  | 0.39    |
| Evenness               | 0.54                | 0.55 | 0.014 | 1.000   | 0.68                | 0.66 | 0.014 | 0.63    | 0.68                 | 0.66 | 0.009 | 0.42    | 0.74                 | 0.75 | 0.004 | 0.45    | 0.74                 | 0.72 | 0.006 | 0.068   | 0.54                 | 0.55 | 0.014 | 1       |
| <b>Anaerobic fungi</b> |                     |      |       |         |                     |      |       |         |                      |      |       |         |                      |      |       |         |                      |      |       |         |                      |      |       |         |
| Shannon                |                     |      |       |         | 1.04                | 0.95 | 0.239 | 0.69    | 1.69                 | 1.41 | 0.353 | 0.72    | 3.78                 | 3.69 | 0.135 | 0.89    | 4.08                 | 4.17 | 0.148 | 1       | 1.04                 | 0.95 | 0.239 | 0.69    |
| Simpson                |                     |      |       |         | 0.79                | 0.82 | 0.048 | 0.69    | 0.86                 | 0.76 | 0.048 | 0.35    | 0.94                 | 0.92 | 0.009 | 0.89    | 0.95                 | 0.94 | 0.008 | 0.50    | 0.79                 | 0.82 | 0.048 | 0.69    |
| Richness               |                     |      |       |         | 30                  | 23   | 9.8   | 0.58    | 156                  | 47   | 44.2  | 0.55    | 422                  | 385  | 43.3  | 0.69    | 358                  | 393  | 51.5  | 0.92    | 30                   | 23   | 9.8   | 0.58    |
| Evenness               |                     |      |       |         | 0.33                | 0.38 | 0.084 | 0.69    | 0.33                 | 0.38 | 0.072 | 0.81    | 0.63                 | 0.66 | 0.017 | 0.31    | 0.72                 | 0.72 | 0.010 | 0.85    | 0.33                 | 0.38 | 0.084 | 0.69    |

<sup>1</sup> n=6 in CONT; n=9 in 3-NOP

<sup>2</sup> n=8 in CONT; n=9 in 3-NOP

<sup>3</sup> n=6 in CONT; n=9 in 3-NOP

<sup>4</sup> n=8 in CONT; n=10 in 3-NOP

**Table S6.** Relative abundance of ruminal taxa in calves aged 1, 4, 11, 14, 23 and 60 weeks, as affected by dietary supplementation of 3NOP.

| Taxa                                  | Week 1 <sup>1</sup> |       | Week 4 <sup>2</sup> |       | Week 11 <sup>3</sup> |       | Week 14 <sup>2</sup> |       | Week 23 <sup>4</sup> |       | Week 60 <sup>3</sup> |       | P-value |       |       |       |       |        |  |
|---------------------------------------|---------------------|-------|---------------------|-------|----------------------|-------|----------------------|-------|----------------------|-------|----------------------|-------|---------|-------|-------|-------|-------|--------|--|
|                                       | CONT                | 3NOP  | CONT                | 3NOP  | CONT                 | 3NOP  | CONT                 | 3NOP  | CONT                 | 3NOP  | CONT                 | 3NOP  | 1       | 4     | 11    | 14    | 23    | 60     |  |
| <b>Archaea</b>                        |                     |       |                     |       |                      |       |                      |       |                      |       |                      |       |         |       |       |       |       |        |  |
| <i>Methanobrevibacter</i>             | 0.68                | 0.12  | 62.18               | 61.41 | 59.61                | 56.56 | 51.12                | 58.27 | 52.48                | 53.04 | 58.41                | 53.36 | 0.262   | 0.632 | 0.48  | 0.057 | 0.966 | 0.103  |  |
| <i>M. boviskoreani</i> clade          | 0.00                | 0.00  | 0.00                | 0.20  | 0.00                 | 0.00  | 0.00                 | 0.00  | 1.02                 | 0.11  | 1.28                 | 1.89  | NA      | 0.315 | NA    | NA    | 0.301 | 0.678  |  |
| <i>M. gottschalkii</i> clade          | 0.21                | 0.01  | 49.31               | 34.66 | 43.81                | 39.77 | 30.67                | 44.26 | 36.60                | 40.60 | 42.45                | 40.90 | 0.177   | 0.083 | 0.59  | 0.012 | 0.352 | 0.686  |  |
| <i>M. oralis</i>                      | 0.00                | 0.00  | 0.20                | 0.14  | 0.37                 | 0.15  | 0.13                 | 0.19  | 0.22                 | 0.16  | 1.34                 | 1.22  | NA      | 0.041 | 0.117 | 0.182 | 0.267 | 0.285  |  |
| <i>M. ruminantium</i> clade           | 0.00                | 0.03  | 9.97                | 21.44 | 12.45                | 13.18 | 16.75                | 11.24 | 11.18                | 8.56  | 8.84                 | 4.88  | 0.421   | 0.077 | 0.847 | 0.237 | 0.321 | 0.024  |  |
| <i>M. smithii</i>                     | 0.00                | 0.00  | 0.01                | 0.01  | 0.02                 | 0.01  | 0.02                 | 0.02  | 0.03                 | 0.02  | 0.05                 | 0.03  | NA      | 0.394 | 0.247 | 0.994 | 0.227 | 0.149  |  |
| Methanobrevibacter unclassified       | 0.00                | 0.00  | 0.46                | 0.45  | 1.07                 | 0.36  | 0.37                 | 0.44  | 0.63                 | 0.45  | 1.69                 | 1.32  | NA      | 0.933 | 0.026 | 0.696 | 0.203 | 0.131  |  |
| <i>Methanosphaera</i>                 | 0.00                | 0.42  | 7.33                | 10.68 | 7.33                 | 6.02  | 7.03                 | 9.45  | 7.49                 | 6.03  | 3.10                 | 2.20  | 0.435   | 0.426 | 0.438 | 0.297 | 0.39  | 0.217  |  |
| Methanobacteriaceae -F                | 0.00                | 0.00  | 0.01                | 0.03  | 0.02                 | 0.01  | 0.01                 | 0.02  | 0.02                 | 0.04  | 0.06                 | 0.04  | NA      | 0.022 | 0.166 | 0.399 | 0.097 | 0.26   |  |
| Methanococcales-o                     | 0.05                | 0.13  | 0.14                | 0.11  | 0.04                 | 0.14  | 0.36                 | 0.01  | 0.30                 | 0.06  | 0.20                 | 0.07  | 0.414   | 0.819 | 0.409 | 0.234 | 0.331 | 0.36   |  |
| <i>Methanomicrobium mobile</i>        | 0.00                | 0.00  | 0.00                | 0.00  | 0.00                 | 0.00  | 0.00                 | 0.00  | 0.00                 | 0.00  | 0.90                 | 3.35  | NA      | NA    | NA    | NA    | NA    | 0.036  |  |
| Methanomassiliococcaceae              |                     |       |                     |       |                      |       |                      |       |                      |       |                      |       |         |       |       |       |       |        |  |
| <i>Group5</i>                         | 0.00                | 0.00  | 0.00                | 0.00  | 0.01                 | 0.01  | 0.01                 | 0.01  | 0.03                 | 0.02  | 0.04                 | 0.04  | NA      | 0.132 | 0.83  | 0.471 | 0.133 | 0.999  |  |
| <i>Group8</i>                         | 0.00                | 0.00  | 0.03                | 0.02  | 2.72                 | 0.84  | 4.07                 | 4.20  | 4.06                 | 2.63  | 1.46                 | 3.79  | NA      | 0.647 | 0.087 | 0.934 | 0.444 | <0.001 |  |
| <i>Group9</i>                         | 0.00                | 0.00  | 7.30                | 0.83  | 6.11                 | 9.84  | 4.52                 | 5.34  | 5.87                 | 5.94  | 7.14                 | 8.83  | NA      | 0.002 | 0.187 | 0.626 | 0.985 | 0.231  |  |
| <i>Group10</i>                        | 0.00                | 0.00  | 7.47                | 5.70  | 8.24                 | 9.95  | 8.29                 | 6.75  | 6.93                 | 4.26  | 6.46                 | 5.04  | NA      | 0.711 | 0.636 | 0.749 | 0.305 | 0.319  |  |
| <i>Group11</i>                        | 0.00                | 0.03  | 5.88                | 10.56 | 1.26                 | 0.72  | 0.63                 | 0.98  | 0.50                 | 0.42  | 0.23                 | 0.17  | 0.435   | 0.281 | 0.498 | 0.637 | 0.823 | 0.55   |  |
| <i>Group12</i>                        | 0.00                | 0.00  | 0.87                | 3.15  | 7.86                 | 9.04  | 12.22                | 7.07  | 4.47                 | 8.05  | 3.28                 | 3.04  | NA      | 0.376 | 0.652 | 0.036 | 0.141 | 0.73   |  |
| Methanomassiliococcaceae unclassified | 0.00                | 0.00  | 6.60                | 4.26  | 5.80                 | 3.89  | 7.56                 | 6.49  | 14.21                | 13.36 | 15.08                | 16.09 | 0.48    | 0.497 | 0.244 | 0.793 | 0.747 | 0.631  |  |
| Euryarchaeota                         | 92.25               | 99.28 | 2.17                | 3.25  | 0.79                 | 2.97  | 3.23                 | 1.38  | 2.82                 | 3.88  | 3.15                 | 3.40  | 0.772   | 0.519 | 0.244 | 0.793 | 0.159 | 0.437  |  |
| <b>Bacteria</b>                       |                     |       |                     |       |                      |       |                      |       |                      |       |                      |       |         |       |       |       |       |        |  |
| Actinobacteria                        | 3.53                | 5.17  | 0.88                | 0.48  | 0.82                 | 0.82  | 1.31                 | 0.93  | 1.71                 | 0.86  | 1.45                 | 0.63  | 0.628   | 0.1   | 0.989 | 0.279 | 0.079 | 0.043  |  |
| <i>Actinomyces</i>                    | 2.49                | 1.43  | 0.00                | 0.00  | 0.00                 | 0.00  | 0.00                 | 0.00  | 0.00                 | 0.00  | 0.00                 | 0.00  | 0.338   | 0.749 | NA    | NA    | NA    | NA     |  |
| <i>Atopobium</i>                      | 0.00                | 0.00  | 0.17                | 0.09  | 0.13                 | 0.09  | 0.11                 | 0.08  | 0.12                 | 0.10  | 0.09                 | 0.04  | NA      | 0.155 | 0.406 | 0.421 | 0.635 | 0.049  |  |
| <i>Collinsella</i>                    | 0.52                | 3.41  | 0.04                | 0.06  | 0.00                 | 0.00  | 0.00                 | 0.01  | 0.00                 | 0.00  | 0.00                 | 0.00  | 0.405   | 0.711 | NA    | 0.387 | 0.42  | NA     |  |

|                                  |       |       |       |       |       |       |       |       |       |       |       |       |       |       |       |       |       |       |
|----------------------------------|-------|-------|-------|-------|-------|-------|-------|-------|-------|-------|-------|-------|-------|-------|-------|-------|-------|-------|
| Coriobacteriaceae-F              | 0.00  | 0.05  | 0.01  | 0.01  | 0.04  | 0.02  | 0.03  | 0.03  | 0.04  | 0.05  | 0.05  | 0.03  | 0.469 | 0.896 | 0.284 | 0.943 | 0.253 | 0.161 |
| Corynebacterium-F                | 0.08  | 0.03  | 0.01  | 0.00  | 0.00  | 0.00  | 0.14  | 0.00  | 0.01  | 0.00  | 0.00  | 0.00  | 0.253 | 0.276 | 0.648 | 0.273 | 0.237 | NA    |
| <i>Denitrobacterium</i>          | 0.00  | 0.00  | 0.00  | 0.00  | 0.00  | 0.00  | 0.00  | 0.01  | 0.01  | 0.01  | 0.00  | 0.00  | NA    | 0.562 | 0.989 | 0.637 | 0.926 | 0.595 |
| <i>Eggerthella</i>               | 0.02  | 0.02  | 0.00  | 0.00  | 0.00  | 0.00  | 0.00  | 0.00  | 0.00  | 0.00  | 0.00  | 0.00  | 0.897 | 0.648 | NA    | NA    | NA    | NA    |
| <i>Enterorhabdus</i>             | 0.00  | 0.00  | 0.02  | 0.03  | 0.02  | 0.03  | 0.01  | 0.03  | 0.01  | 0.02  | 0.02  | 0.01  | 0.435 | 0.405 | 0.165 | 0.178 | 0.276 | 0.306 |
| <i>Olsenella</i>                 | 0.00  | 0.00  | 0.57  | 0.26  | 0.62  | 0.63  | 0.99  | 0.75  | 1.49  | 0.65  | 1.19  | 0.49  | 0.234 | 0.15  | 0.969 | 0.461 | 0.061 | 0.07  |
| <i>Paraeggerthella</i>           | 0.26  | 0.07  | 0.00  | 0.00  | 0.00  | 0.00  | 0.00  | 0.00  | 0.00  | 0.00  | 0.00  | 0.00  | 0.197 | NA    | NA    | NA    | NA    | NA    |
| <i>Senegalimassilia</i>          | 0.01  | 0.02  | 0.02  | 0.01  | 0.02  | 0.02  | 0.02  | 0.01  | 0.04  | 0.02  | 0.07  | 0.04  | 0.617 | 0.51  | 0.837 | 0.308 | 0.272 | 0.124 |
| <i>Trueperella</i>               | 0.14  | 0.12  | 0.00  | 0.00  | 0.00  | 0.00  | 0.00  | 0.00  | 0.00  | 0.00  | 0.00  | 0.00  | 0.851 | 0.276 | NA    | NA    | NA    | NA    |
| Bacteroidetes                    | 49.43 | 61.97 | 52.01 | 55.63 | 37.98 | 41.87 | 35.13 | 35.75 | 43.62 | 47.19 | 39.13 | 39.39 | 0.253 | 0.651 | 0.338 | 0.897 | 0.476 | 0.954 |
| <i>Alistipes</i>                 | 0.12  | 0.05  | 0.00  | 0.01  | 0.00  | 0.00  | 0.00  | 0.00  | 0.00  | 0.00  | 0.00  | 0.00  | 0.459 | 0.558 | NA    | 0.387 | NA    | NA    |
| <i>Alloprevotella</i>            | 13.26 | 5.28  | 0.99  | 1.47  | 0.07  | 0.04  | 0.08  | 0.04  | 0.04  | 0.04  | 0.01  | 0.00  | 0.07  | 0.442 | 0.236 | 0.024 | 0.981 | 0.498 |
| Bacteroidales_BS11_gut_group-F   | 0.00  | 0.00  | 12.99 | 17.03 | 0.26  | 0.16  | 0.62  | 0.16  | 1.42  | 1.56  | 1.18  | 1.26  | 0.435 | 0.7   | 0.065 | 0.029 | 0.791 | 0.919 |
| Bacteroidales_RF16-F             | 0.00  | 0.00  | 4.04  | 1.21  | 5.37  | 8.14  | 4.64  | 5.19  | 13.07 | 12.02 | 20.26 | 20.64 | 0.28  | 0.249 | 0.35  | 0.786 | 0.83  | 0.926 |
| <i>Bacteroidales_S24-7_group</i> | 0.06  | 0.00  | 0.63  | 0.81  | 0.50  | 2.70  | 0.58  | 0.66  | 0.61  | 0.41  | 1.43  | 0.77  | 0.237 | 0.669 | 0.352 | 0.761 | 0.166 | 0.011 |
| Bacteroidales-O                  | 0.22  | 0.01  | 3.94  | 4.21  | 3.55  | 8.70  | 3.25  | 2.81  | 0.16  | 0.14  | 0.15  | 0.20  | 0.024 | 0.925 | 0.019 | 0.729 | 0.758 | 0.206 |
| <i>Bacteroides</i>               | 21.77 | 47.19 | 0.29  | 0.32  | 0.00  | 0.00  | 0.00  | 0.01  | 0.00  | 0.00  | 0.00  | 0.00  | 0.101 | 0.898 | 0.434 | 0.352 | 0.632 | 0.962 |
| Bacteroidetes unclassified       | 0.00  | 0.00  | 0.50  | 0.09  | 0.19  | 0.23  | 0.14  | 0.13  | 0.09  | 0.25  | 0.12  | 0.07  | NA    | 0.291 | 0.838 | 0.866 | 0.339 | 0.178 |
| <i>Barnesiella</i>               | 0.02  | 0.01  | 0.00  | 0.02  | 0.00  | 0.00  | 0.00  | 0.00  | 0.00  | 0.00  | 0.00  | 0.00  | 0.405 | 0.335 | NA    | NA    | NA    | NA    |
| <i>Bergeyella</i>                | 0.01  | 0.02  | 0.00  | 0.00  | 0.00  | 0.00  | 0.00  | 0.00  | 0.00  | 0.00  | 0.00  | 0.00  | 0.534 | NA    | NA    | 0.387 | 0.244 | NA    |
| <i>Butyricimonas</i>             | 3.06  | 0.79  | 0.04  | 0.14  | 0.00  | 0.00  | 0.00  | 0.00  | 0.00  | 0.00  | 0.00  | 0.00  | 0.12  | 0.319 | NA    | NA    | NA    | NA    |
| <i>Capnocytophaga</i>            | 0.12  | 0.05  | 0.00  | 0.00  | 0.00  | 0.00  | 0.00  | 0.00  | 0.00  | 0.00  | 0.00  | 0.00  | 0.445 | NA    | NA    | 0.387 | NA    | NA    |
| Marinilabiaceae-F                | 0.00  | 0.00  | 0.00  | 0.00  | 0.00  | 0.00  | 0.00  | 0.00  | 0.01  | 0.00  | 0.03  | 0.01  | NA    | 0.276 | 0.543 | 0.684 | 0.147 | 0.469 |
| <i>Odoribacter</i>               | 0.43  | 0.16  | 0.00  | 0.01  | 0.00  | 0.00  | 0.00  | 0.00  | 0.00  | 0.00  | 0.00  | 0.00  | 0.027 | 0.46  | NA    | NA    | NA    | NA    |
| <i>Parabacteroides</i>           | 1.69  | 0.82  | 0.00  | 0.03  | 0.00  | 0.00  | 0.00  | 0.00  | 0.00  | 0.00  | 0.00  | 0.00  | 0.298 | 0.082 | NA    | 0.387 | NA    | NA    |
| <i>Phocaeicola</i>               | 0.00  | 0.00  | 1.03  | 0.39  | 0.11  | 0.54  | 0.11  | 0.14  | 0.07  | 0.07  | 0.09  | 0.04  | 0.234 | 0.074 | 0.021 | 0.582 | 0.978 | 0.145 |
| Porphyromonadaceae-F             | 0.10  | z     | 0.03  | 0.06  | 0.00  | 0.00  | 0.00  | 0.00  | 0.01  | 0.00  | 0.02  | 0.03  | 0.234 | 0.396 | 0.291 | 0.387 | 0.091 | 0.518 |
| <i>Porphyromonas</i>             | 6.62  | 1.40  | 0.01  | 0.00  | 0.00  | 0.00  | 0.00  | 0.00  | 0.00  | 0.00  | 0.00  | 0.00  | 0.112 | 0.062 | NA    | NA    | NA    | NA    |
| <i>Prevotella</i>                | 0.87  | 3.73  | 20.78 | 20.89 | 19.58 | 12.91 | 13.25 | 18.32 | 18.50 | 24.85 | 9.77  | 10.73 | 0.294 | 0.964 | 0.037 | 0.9   | 0.03  | 0.661 |
| <i>Prevotella_7</i>              | 0.02  | 0.34  | 0.07  | 0.10  | 0.10  | 0.08  | 4.46  | 0.18  | 0.03  | 0.04  | 0.00  | 0.00  | 0.35  | 0.7   | 0.357 | 0.279 | 0.488 | 0.304 |
| <i>Prevotella_9</i>              | 0.01  | 0.44  | 0.00  | 0.19  | 0.00  | 0.00  | 0.09  | 0.00  | 0.00  | 0.00  | 0.00  | 0.00  | 0.313 | 0.293 | NA    | 0.136 | NA    | NA    |
| Prevotellaceae-F                 | 0.90  | 0.66  | 2.46  | 1.94  | 5.01  | 3.57  | 5.04  | 4.26  | 3.45  | 1.93  | 1.73  | 1.56  | 0.623 | 0.522 | 0.379 | 0.702 | 0.07  | 0.577 |



|                                                |       |       |       |       |       |       |       |       |       |       |       |       |       |       |       |       |       |       |
|------------------------------------------------|-------|-------|-------|-------|-------|-------|-------|-------|-------|-------|-------|-------|-------|-------|-------|-------|-------|-------|
| <i>Rikenellaceae_RC9_gut_group</i>             | 0.05  | 0.25  | 4.17  | 6.64  | 3.20  | 4.76  | 2.84  | 3.77  | 6.12  | 5.86  | 4.30  | 4.05  | 0.335 | 0.408 | 0.181 | 0.303 | 0.856 | 0.802 |
| Rikenellaceae-F                                | 0.00  | 0.00  | 0.03  | 0.07  | 0.02  | 0.04  | 0.02  | 0.06  | 0.04  | 0.02  | 0.03  | 0.01  | 0.435 | 0.347 | 0.196 | 0.197 | 0.553 | 0.095 |
| Cyanobacteria                                  |       |       |       |       |       |       |       |       |       |       |       |       |       |       |       |       |       |       |
| Gastranaerophilales-O                          | 0.00  | 0.00  | 0.47  | 0.25  | 5.78  | 4.45  | 6.79  | 3.65  | 8.25  | 6.66  | 4.48  | 3.91  | 0.234 | 0.326 | 0.466 | 0.062 | 0.411 | 0.531 |
| Elusimicrobia                                  |       |       |       |       |       |       |       |       |       |       |       |       |       |       |       |       |       |       |
| Elusimicrobia-C                                | 0.00  | 0.00  | 0.00  | 0.00  | 0.01  | 0.02  | 0.00  | 0.00  | 0.02  | 0.02  | 0.07  | 0.02  | NA    | 0.228 | 0.621 | 0.637 | 0.524 | 0.251 |
| Fibrobacteres                                  |       |       |       |       |       |       |       |       |       |       |       |       |       |       |       |       |       |       |
| <i>Fibrobacter</i>                             | 0.00  | 0.25  | 1.99  | 6.67  | 3.73  | 3.47  | 7.78  | 5.90  | 9.09  | 6.20  | 20.75 | 31.46 | 0.165 | 0.126 | 0.826 | 0.43  | 0.04  | 0.013 |
| Firmicutes                                     | 17.10 | 16.95 | 28.70 | 22.04 | 40.88 | 38.06 | 37.24 | 38.61 | 20.17 | 23.10 | 23.58 | 15.01 | 0.987 | 0.22  | 0.52  | 0.745 | 0.256 | 0.065 |
| <i>Acetitomaculum</i>                          | 0.01  | 0.00  | 5.12  | 0.65  | 2.00  | 1.46  | 1.83  | 0.99  | 0.81  | 0.61  | 1.02  | 0.41  | 0.449 | 0.187 | 0.357 | 0.103 | 0.35  | 0.116 |
| <i>Acidaminococcus</i>                         | 0.00  | 0.00  | 0.02  | 0.01  | 0.00  | 0.00  | 0.00  | 0.01  | 0.00  | 0.00  | 0.00  | 0.00  | 0.435 | 0.627 | NA    | 0.387 | NA    | NA    |
| <i>Anaerotruncus</i>                           | 0.01  | 0.02  | 0.02  | 0.01  | 0.03  | 0.03  | 0.02  | 0.03  | 0.06  | 0.04  | 0.09  | 0.02  | 0.423 | 0.407 | 0.512 | 0.326 | 0.179 | 4E-04 |
| <i>Anaerovorax</i>                             | 0.00  | 0.00  | 0.02  | 0.02  | 0.02  | 0.01  | 0.02  | 0.01  | 0.02  | 0.01  | 0.03  | 0.03  | NA    | 0.928 | 0.413 | 0.135 | 0.024 | 0.793 |
| <i>Asteroleplasma</i>                          | 0.01  | 0.01  | 0.03  | 0.23  | 0.09  | 0.06  | 0.10  | 0.16  | 0.09  | 0.13  | 0.14  | 0.17  | 0.834 | 0.408 | 0.565 | 0.593 | 0.682 | 0.569 |
| <i>Blautia</i>                                 | 0.11  | 0.05  | 0.02  | 0.10  | 0.02  | 0.01  | 0.02  | 0.01  | 0.02  | 0.01  | 0.04  | 0.02  | 0.261 | 0.271 | 0.577 | 0.391 | 0.483 | 0.141 |
| <i>Butyricoccus</i>                            | 0.15  | 0.10  | 0.00  | 0.01  | 0.00  | 0.00  | 0.00  | 0.00  | 0.00  | 0.00  | 0.00  | 0.00  | 0.714 | 0.269 | NA    | 0.387 | NA    | NA    |
| <i>Butyrivibrio</i>                            | 0.52  | 0.47  | 0.92  | 0.42  | 2.15  | 1.74  | 2.34  | 1.91  | 1.29  | 1.22  | 1.07  | 0.78  | 0.943 | 0.038 | 0.563 | 0.372 | 0.811 | 0.37  |
| <i>Catenisphaera</i>                           | 0.00  | 0.00  | 0.04  | 0.05  | 0.01  | 0.00  | 0.01  | 0.00  | 0.01  | 0.00  | 0.00  | 0.00  | 0.234 | 0.989 | 0.187 | 0.552 | 0.039 | 0.828 |
| <i>Cellulosilyticum</i>                        | 0.05  | 0.00  | 0.00  | 0.00  | 0.00  | 0.00  | 0.00  | 0.00  | 0.00  | 0.00  | 0.00  | 0.00  | 0.08  | NA    | NA    | NA    | NA    | NA    |
| <i>Christensenellaceae_R-7_group</i>           | 0.02  | 0.01  | 3.28  | 1.54  | 3.03  | 2.09  | 2.19  | 1.99  | 2.63  | 2.85  | 3.40  | 1.95  | 0.384 | 0.122 | 0.109 | 0.71  | 0.736 | 0.027 |
| Christensenellaceae-F                          | 0.00  | 0.00  | 0.02  | 0.00  | 0.01  | 0.01  | 0.01  | 0.01  | 0.01  | 0.01  | 0.02  | 0.01  | NA    | 0.006 | 0.937 | 0.558 | 0.466 | 0.14  |
| Clostridiales                                  |       |       |       |       |       |       |       |       |       |       |       |       |       |       |       |       |       |       |
| <i>Family_XIII_AD3011_group</i>                | 0.00  | 0.00  | 0.11  | 0.05  | 0.03  | 0.03  | 0.02  | 0.03  | 0.05  | 0.03  | 0.05  | 0.01  | NA    | 0.071 | 0.982 | 0.383 | 0.332 | 0.047 |
| <i>Clostridiales_Eubacterium_nodatum_group</i> | 0.00  | 0.00  | 0.03  | 0.03  | 0.03  | 0.02  | 0.02  | 0.02  | 0.02  | 0.02  | 0.02  | 0.01  | NA    | 0.928 | 0.7   | 0.766 | 0.915 | 0.241 |
| <i>Clostridiales_vadinBB60-F</i>               | 0.17  | 0.43  | 0.46  | 0.54  | 0.67  | 0.49  | 0.64  | 1.10  | 0.75  | 0.75  | 1.25  | 1.37  | 0.329 | 0.792 | 0.327 | 0.391 | 0.985 | 0.667 |
| Clostridiales-O                                | 0.06  | 0.04  | 0.03  | 0.12  | 0.40  | 0.08  | 0.15  | 0.20  | 0.03  | 0.10  | 0.08  | 0.04  | 0.663 | 0.474 | 0.288 | 0.58  | 0.015 | 0.004 |
| <i>Clostridium_sensu_stricto_1</i>             | 0.01  | 0.02  | 0.02  | 1.05  | 0.00  | 0.00  | 0.00  | 0.00  | 0.00  | 0.00  | 0.00  | 0.00  | 0.755 | 0.051 | NA    | 0.276 | 0.42  | 0.148 |
| <i>Clostridium_sensu_stricto_2</i>             | 0.02  | 0.01  | 0.00  | 0.00  | 0.00  | 0.00  | 0.00  | 0.00  | 0.00  | 0.00  | 0.00  | 0.00  | 0.574 | NA    | NA    | NA    | NA    | NA    |
| <i>Coprococcus_1</i>                           | 0.00  | 0.00  | 0.04  | 0.05  | 0.05  | 0.03  | 0.02  | 0.02  | 0.02  | 0.04  | 0.02  | 0.01  | NA    | 0.879 | 0.14  | 0.599 | 0.105 | 0.297 |
| <i>Coprococcus_2</i>                           | 0.00  | 0.00  | 0.86  | 0.62  | 0.56  | 0.65  | 0.23  | 0.34  | 0.04  | 0.09  | 0.01  | 0.02  | NA    | 0.679 | 0.789 | 0.313 | 0.438 | 0.495 |
| <i>Defluviitaleaceae_UCG-011</i>               | 0.00  | 0.00  | 0.04  | 0.01  | 0.08  | 0.04  | 0.05  | 0.02  | 0.04  | 0.03  | 0.02  | 0.01  | NA    | 0.008 | 0.049 | 0.02  | 0.415 | 0.111 |
| <i>Dialister</i>                               | 0.00  | 0.07  | 0.00  | 0.06  | 0.00  | 0.00  | 0.00  | 0.00  | 0.00  | 0.00  | 0.00  | 0.00  | 0.435 | 0.369 | NA    | NA    | NA    | NA    |

|                                                         |      |      |      |      |      |      |      |      |      |      |      |      |       |       |       |       |       |       |
|---------------------------------------------------------|------|------|------|------|------|------|------|------|------|------|------|------|-------|-------|-------|-------|-------|-------|
| <i>Dielma</i>                                           | 0.01 | 0.03 | 0.00 | 0.00 | 0.00 | 0.00 | 0.00 | 0.00 | 0.00 | 0.00 | 0.00 | 0.00 | 0.482 | NA    | NA    | NA    | NA    | NA    |
| <i>Dorea</i>                                            | 0.00 | 0.02 | 0.00 | 0.00 | 0.00 | 0.00 | 0.00 | 0.00 | 0.00 | 0.00 | 0.00 | 0.00 | 0.275 | 0.877 | NA    | 0.387 | NA    | NA    |
| Enterococcaceae-F                                       | 0.00 | 0.01 | 0.00 | 0.00 | 0.00 | 0.00 | 0.00 | 0.00 | 0.00 | 0.00 | 0.00 | 0.00 | 0.482 | NA    | NA    | NA    | NA    | NA    |
| <i>Enterococcus</i>                                     | 0.01 | 7.00 | 0.00 | 0.00 | 0.00 | 0.00 | 0.00 | 0.00 | 0.00 | 0.00 | 0.00 | 0.00 | 0.428 | 0.276 | NA    | NA    | NA    | NA    |
| <i>Erysipelatoclostridium</i>                           | 0.06 | 0.05 | 0.00 | 0.00 | 0.00 | 0.00 | 0.00 | 0.00 | 0.00 | 0.00 | 0.00 | 0.00 | 0.735 | NA    | NA    | NA    | NA    | NA    |
| <i>Erysipelotrichaceae_UCG-002</i>                      | 0.00 | 0.00 | 1.72 | 4.28 | 0.16 | 0.37 | 1.10 | 1.15 | 0.00 | 0.00 | 0.00 | 0.00 | NA    | 0.502 | 0.528 | 0.948 | 0.42  | NA    |
| <i>Erysipelotrichaceae_UCG-004</i>                      | 0.26 | 0.01 | 0.30 | 0.24 | 0.61 | 0.52 | 0.74 | 1.75 | 1.41 | 1.30 | 3.07 | 2.57 | 0.169 | 0.761 | 0.579 | 0.309 | 0.79  | 0.195 |
| Erysipelotrichaceae-F                                   | 0.00 | 0.00 | 0.06 | 0.03 | 0.05 | 0.04 | 0.03 | 0.03 | 0.03 | 0.03 | 0.02 | 0.01 | 0.488 | 0.263 | 0.211 | 0.955 | 0.911 | 0.243 |
| <i>Eubacterium</i>                                      | 0.02 | 0.01 | 0.01 | 0.01 | 0.00 | 0.00 | 0.00 | 0.00 | 0.00 | 0.00 | 0.00 | 0.00 | 0.181 | 0.412 | NA    | NA    | NA    | NA    |
| <i>Gemella</i>                                          | 0.01 | 0.01 | 0.00 | 0.00 | 0.00 | 0.00 | 0.00 | 0.00 | 0.00 | 0.00 | 0.00 | 0.00 | 0.818 | NA    | NA    | NA    | NA    | NA    |
| <i>Granulicatella</i>                                   | 0.13 | 0.03 | 0.00 | 0.00 | 0.00 | 0.00 | 0.00 | 0.00 | 0.00 | 0.00 | 0.00 | 0.00 | 0.391 | 0.387 | NA    | NA    | NA    | NA    |
| Halanaerobiales-O                                       | 0.00 | 0.00 | 0.02 | 0.10 | 0.04 | 0.03 | 0.02 | 0.03 | 0.01 | 0.04 | 0.00 | 0.00 | NA    | 0.248 | 0.231 | 0.457 | 0.429 | NA    |
| <i>Helcococcus</i>                                      | 0.05 | 0.06 | 0.00 | 0.00 | 0.00 | 0.00 | 0.00 | 0.00 | 0.00 | 0.00 | 0.00 | 0.00 | 0.846 | 0.453 | 0.362 | NA    | NA    | NA    |
| <i>Howardella</i>                                       | 0.00 | 0.03 | 0.01 | 0.01 | 0.02 | 0.01 | 0.02 | 0.02 | 0.02 | 0.03 | 0.01 | 0.02 | 0.105 | 0.326 | 0.386 | 0.479 | 0.229 | 0.475 |
| <i>Kandleria</i>                                        | 0.00 | 0.00 | 0.14 | 0.18 | 0.05 | 0.03 | 0.03 | 0.02 | 0.00 | 0.00 | 0.00 | 0.00 | NA    | 0.834 | 0.303 | 0.699 | 0.259 | NA    |
| <i>Lachnobacterium</i>                                  | 0.00 | 0.00 | 0.01 | 0.00 | 0.00 | 0.00 | 0.02 | 0.01 | 0.00 | 0.01 | 0.00 | 0.00 | NA    | 0.333 | 0.912 | 0.258 | 0.602 | 0.129 |
| <i>Lachnoclostridium</i>                                | 1.15 | 0.52 | 0.05 | 0.08 | 0.00 | 0.00 | 0.00 | 0.00 | 0.00 | 0.00 | 0.00 | 0.00 | 0.069 | 0.566 | 0.188 | 0.856 | 0.027 | 0.176 |
| <i>Lachnoclostridium_10</i>                             | 0.00 | 0.00 | 0.04 | 0.01 | 0.03 | 0.02 | 0.04 | 0.02 | 0.05 | 0.03 | 0.15 | 0.07 | NA    | 0.103 | 0.341 | 0.263 | 0.485 | 0.178 |
| <i>Lachnoclostridium_12</i>                             | 0.00 | 0.00 | 0.00 | 0.00 | 0.02 | 0.02 | 0.03 | 0.04 | 0.00 | 0.01 | 0.00 | 0.00 | NA    | 0.276 | 0.917 | 0.777 | 0.182 | 0.66  |
| <i>Lachnoclostridium_5</i>                              | 0.51 | 0.16 | 0.00 | 0.00 | 0.00 | 0.00 | 0.00 | 0.00 | 0.00 | 0.00 | 0.00 | 0.00 | 0.162 | NA    | 0.304 | 0.276 | 0.244 | 0.592 |
| <i>Lachnospira</i>                                      | 0.00 | 0.00 | 0.00 | 0.03 | 0.02 | 0.00 | 0.02 | 0.03 | 0.00 | 0.01 | 0.00 | 0.00 | NA    | 0.224 | 0.299 | 0.368 | 0.37  | NA    |
| <i>Lachnospiraceae_AC2044_group</i>                     | 0.00 | 0.01 | 0.20 | 0.05 | 0.82 | 0.28 | 0.61 | 0.89 | 0.57 | 0.61 | 0.84 | 0.40 | 0.388 | 0.198 | 6E-04 | 0.349 | 0.858 | 0.092 |
| <i>Lachnospiraceae_Bacteroides_pectinophilus_group</i>  | 0.00 | 0.00 | 0.00 | 0.00 | 0.00 | 0.00 | 0.00 | 0.00 | 0.08 | 0.00 | 0.00 | 0.00 | NA    | NA    | NA    | NA    | 0.238 | 0.304 |
| <i>Lachnospiraceae_Eubacterium_cellulosolvens_group</i> | 0.00 | 0.00 | 0.06 | 0.02 | 0.16 | 0.05 | 0.22 | 0.22 | 0.02 | 0.03 | 0.01 | 0.01 | NA    | 0.285 | 0.085 | 0.954 | 0.64  | 0.708 |
| <i>Lachnospiraceae_Eubacterium_eligens_group</i>        | 0.01 | 0.01 | 0.01 | 0.01 | 0.07 | 0.01 | 0.06 | 0.05 | 0.00 | 0.01 | 0.00 | 0.00 | 0.471 | 0.962 | 0.141 | 0.853 | 0.322 | NA    |
| <i>Lachnospiraceae_Eubacterium_hallii_group</i>         | 0.00 | 0.00 | 0.07 | 0.32 | 0.10 | 0.09 | 0.14 | 0.13 | 0.08 | 0.07 | 0.09 | 0.04 | NA    | 0.313 | 0.709 | 0.807 | 0.733 | 0.054 |
| <i>Lachnospiraceae_Eubacterium_rectale_group</i>        | 0.00 | 0.00 | 0.02 | 0.01 | 0.09 | 0.03 | 0.10 | 0.11 | 0.02 | 0.01 | 0.03 | 0.02 | NA    | 0.074 | 0.022 | 0.907 | 0.636 | 0.164 |

|                                                       |      |      |      |      |      |      |      |      |      |      |      |      |       |       |       |       |       |       |
|-------------------------------------------------------|------|------|------|------|------|------|------|------|------|------|------|------|-------|-------|-------|-------|-------|-------|
| <i>Lachnospiraceae_Eubacterium_ruminantium_group</i>  | 0.00 | 0.00 | 0.12 | 0.30 | 0.34 | 0.53 | 0.69 | 0.38 | 0.10 | 0.17 | 0.12 | 0.08 | 0.435 | 0.333 | 0.462 | 0.135 | 0.187 | 0.314 |
| <i>Lachnospiraceae_Eubacterium_ventriosum_group</i>   | 0.00 | 0.00 | 0.01 | 0.00 | 0.03 | 0.01 | 0.03 | 0.04 | 0.05 | 0.06 | 0.10 | 0.04 | NA    | 0.608 | 0.015 | 0.455 | 0.59  | 0.029 |
| <i>Lachnospiraceae_Eubacterium_xylanophilum_group</i> | 0.00 | 0.00 | 0.00 | 0.01 | 0.04 | 0.02 | 0.06 | 0.03 | 0.03 | 0.04 | 0.01 | 0.01 | NA    | 0.389 | 0.086 | 0.014 | 0.608 | 0.814 |
| <i>Lachnospiraceae_NC2004_group</i>                   | 0.00 | 0.00 | 0.00 | 0.00 | 0.00 | 0.03 | 0.01 | 0.01 | 0.00 | 0.01 | 0.00 | 0.00 | NA    | NA    | 0.362 | 0.693 | 0.14  | 0.362 |
| <i>Lachnospiraceae_ND3007_group</i>                   | 0.00 | 0.00 | 0.00 | 0.00 | 0.07 | 0.01 | 0.04 | 0.04 | 0.05 | 0.08 | 0.46 | 0.34 | NA    | 0.626 | 0.12  | 0.98  | 0.492 | 0.341 |
| <i>Lachnospiraceae_NK3A20_group</i>                   | 0.00 | 0.00 | 3.66 | 2.09 | 2.48 | 1.65 | 1.39 | 1.51 | 0.93 | 0.82 | 0.78 | 0.39 | 0.071 | 0.331 | 0.3   | 0.849 | 0.627 | 0.111 |
| <i>Lachnospiraceae_NK4A136_group</i>                  | 0.01 | 0.02 | 0.38 | 0.44 | 0.74 | 3.48 | 0.48 | 0.79 | 0.25 | 0.26 | 0.31 | 0.26 | 0.469 | 0.796 | 0.349 | 0.247 | 0.897 | 0.662 |
| <i>Lachnospiraceae_Ruminococcus_gaureauii_group</i>   | 0.00 | 0.00 | 0.23 | 0.28 | 0.18 | 0.08 | 0.22 | 0.12 | 0.28 | 0.19 | 0.13 | 0.10 | NA    | 0.778 | 0.011 | 0.031 | 0.118 | 0.391 |
| <i>Lachnospiraceae_Ruminococcus_torques_group</i>     | 0.00 | 0.08 | 0.00 | 0.00 | 0.00 | 0.00 | 0.00 | 0.00 | 0.00 | 0.00 | 0.00 | 0.00 | 0.319 | 0.249 | 0.177 | 0.754 | NA    | NA    |
| <i>Lachnospiraceae_UCG-001</i>                        | 0.00 | 0.00 | 0.01 | 0.01 | 0.13 | 0.13 | 0.04 | 0.08 | 0.01 | 0.02 | 0.00 | 0.00 | NA    | 0.99  | 0.99  | 0.229 | 0.185 | 0.304 |
| <i>Lachnospiraceae_UCG-006</i>                        | 0.00 | 0.00 | 0.01 | 0.01 | 0.05 | 0.03 | 0.05 | 0.04 | 0.05 | 0.05 | 0.12 | 0.04 | 0.435 | 0.717 | 0.181 | 0.368 | 0.883 | 0.044 |
| <i>Lachnospiraceae_UCG-008</i>                        | 0.00 | 0.00 | 0.04 | 0.02 | 0.06 | 0.06 | 0.04 | 0.04 | 0.04 | 0.04 | 0.06 | 0.03 | NA    | 0.084 | 0.996 | 0.852 | 0.552 | 0.054 |
| <i>Lachnospiraceae_UCG-009</i>                        | 0.00 | 0.02 | 0.03 | 0.02 | 0.08 | 0.03 | 0.03 | 0.04 | 0.05 | 0.03 | 0.13 | 0.05 | 0.234 | 0.627 | 0.163 | 0.765 | 0.248 | 0.109 |
| <i>Lachnospiraceae_XPB1014_group</i>                  | 0.00 | 0.00 | 0.76 | 0.68 | 0.23 | 1.16 | 0.42 | 0.48 | 1.41 | 0.33 | 0.73 | 0.28 | 0.234 | 0.847 | 0.108 | 0.834 | 0.237 | 0.103 |
| Lachnospiraceae-F                                     | 4.46 | 0.18 | 0.90 | 0.33 | 1.05 | 0.72 | 0.95 | 0.77 | 0.62 | 0.45 | 1.21 | 0.74 | 0.233 | 0.082 | 0.111 | 0.388 | 0.103 | 0.258 |
| Lactobacillales-O                                     | 0.04 | 0.02 | 0.00 | 0.00 | 0.00 | 0.00 | 0.00 | 0.00 | 0.00 | 0.00 | 0.00 | 0.00 | 0.525 | NA    | NA    | NA    | NA    | NA    |
| <i>Lactobacillus</i>                                  | 0.01 | 0.00 | 0.00 | 0.00 | 0.00 | 0.00 | 0.00 | 0.02 | 0.00 | 0.00 | 0.00 | 0.00 | 0.258 | 0.74  | 0.514 | 0.387 | NA    | NA    |
| <i>Marvinbryantia</i>                                 | 0.00 | 0.00 | 0.02 | 0.01 | 0.04 | 0.04 | 0.03 | 0.03 | 0.04 | 0.05 | 0.02 | 0.03 | NA    | 0.215 | 0.721 | 0.406 | 0.645 | 0.463 |
| <i>Megasphaera</i>                                    | 0.00 | 0.19 | 0.03 | 0.02 | 0.00 | 0.00 | 0.00 | 0.00 | 0.00 | 0.00 | 0.00 | 0.00 | 0.435 | 0.609 | NA    | NA    | NA    | NA    |
| <i>Mogibacterium</i>                                  | 0.00 | 0.01 | 0.06 | 0.03 | 0.04 | 0.02 | 0.01 | 0.02 | 0.07 | 0.06 | 0.05 | 0.06 | 0.435 | 0.242 | 0.153 | 0.670 | 0.591 | 0.761 |
| <i>Moryella</i>                                       | 0.00 | 0.00 | 0.08 | 0.14 | 0.07 | 0.02 | 0.03 | 0.03 | 0.07 | 0.03 | 0.05 | 0.04 | NA    | 0.348 | 0.008 | 0.538 | 0.009 | 0.711 |
| <i>Negativicoccus</i>                                 | 1.89 | 2.32 | 0.00 | 0.00 | 0.00 | 0.00 | 0.00 | 0.00 | 0.00 | 0.00 | 0.00 | 0.00 | 0.838 | NA    | NA    | NA    | NA    | NA    |
| <i>Oribacterium</i>                                   | 0.00 | 0.00 | 0.02 | 0.04 | 0.06 | 0.04 | 0.54 | 0.84 | 0.03 | 0.07 | 0.02 | 0.01 | NA    | 0.492 | 0.374 | 0.702 | 0.396 | 0.247 |
| <i>Oscillospira</i>                                   | 0.00 | 0.02 | 0.00 | 0.00 | 0.00 | 0.01 | 0.00 | 0.00 | 0.00 | 0.01 | 0.00 | 0.00 | 0.421 | 0.128 | 0.187 | 0.202 | 0.247 | NA    |
| <i>Papillibacter</i>                                  | 0.00 | 0.00 | 0.04 | 0.05 | 0.01 | 0.01 | 0.02 | 0.01 | 0.03 | 0.02 | 0.13 | 0.06 | NA    | 0.892 | 0.563 | 0.054 | 0.904 | 0.292 |
| <i>Parvimonas</i>                                     | 0.85 | 0.34 | 0.00 | 0.00 | 0.00 | 0.00 | 0.00 | 0.00 | 0.00 | 0.00 | 0.00 | 0.00 | 0.484 | 0.452 | NA    | NA    | 0.244 | 0.304 |
| <i>Peptococcus</i>                                    | 0.03 | 0.01 | 0.00 | 0.00 | 0.00 | 0.00 | 0.00 | 0.00 | 0.00 | 0.00 | 0.00 | 0.00 | 0.347 | 0.276 | NA    | NA    | NA    | NA    |
| <i>Peptoniphilus</i>                                  | 0.02 | 0.00 | 0.00 | 0.00 | 0.00 | 0.00 | 0.00 | 0.00 | 0.00 | 0.00 | 0.00 | 0.00 | 0.102 | NA    | NA    | NA    | NA    | NA    |

|                                      |      |      |      |      |      |      |      |      |      |      |      |      |       |       |       |       |       |       |
|--------------------------------------|------|------|------|------|------|------|------|------|------|------|------|------|-------|-------|-------|-------|-------|-------|
| <i>Peptostreptococcus</i>            | 0.11 | 0.05 | 0.00 | 0.00 | 0.00 | 0.00 | 0.00 | 0.00 | 0.00 | 0.00 | 0.00 | 0.00 | 0.147 | 0.387 | NA    | 0.387 | NA    | NA    |
| <i>Phascolarctobacterium</i>         | 0.47 | 0.43 | 0.02 | 0.02 | 0.00 | 0.00 | 0.00 | 0.00 | 0.00 | 0.00 | 0.00 | 0.00 | 0.880 | 0.873 | NA    | NA    | NA    | NA    |
| <i>Pseudobutyrvibrio</i>             | 0.00 | 0.03 | 0.38 | 0.20 | 0.84 | 0.67 | 0.90 | 0.62 | 0.59 | 0.53 | 0.72 | 0.57 | 0.198 | 0.015 | 0.446 | 0.215 | 0.645 | 0.529 |
| <i>Romboutsia</i>                    | 0.01 | 0.00 | 0.00 | 0.00 | 0.00 | 0.00 | 0.01 | 0.00 | 0.01 | 0.00 | 0.02 | 0.01 | 0.078 | 0.480 | 0.705 | 0.326 | 0.026 | 0.717 |
| <i>Roseburia</i>                     | 0.01 | 0.00 | 0.41 | 0.17 | 0.56 | 0.41 | 0.65 | 1.38 | 0.11 | 0.14 | 0.12 | 0.09 | 0.234 | 0.188 | 0.259 | 0.441 | 0.507 | 0.427 |
| <i>Ruminiclostridium_1</i>           | 0.00 | 0.00 | 0.02 | 0.00 | 0.01 | 0.01 | 0.02 | 0.01 | 0.04 | 0.02 | 0.06 | 0.03 | NA    | 0.107 | 0.498 | 0.113 | 0.228 | 0.086 |
| <i>Ruminiclostridium_6</i>           | 0.00 | 0.00 | 0.03 | 0.02 | 0.02 | 0.02 | 0.01 | 0.01 | 0.02 | 0.01 | 0.00 | 0.01 | 0.435 | 0.694 | 0.504 | 0.400 | 0.444 | 0.231 |
| <i>Ruminiclostridium_9</i>           | 0.01 | 0.01 | 0.18 | 0.35 | 8.68 | 8.13 | 7.88 | 9.20 | 1.48 | 5.01 | 0.03 | 0.02 | 0.526 | 0.272 | 0.862 | 0.668 | 0.052 | 0.654 |
| <i>Ruminococcaceae_NK4A214_group</i> | 0.13 | 0.11 | 1.87 | 1.86 | 2.39 | 3.12 | 2.15 | 2.67 | 1.05 | 1.13 | 1.04 | 0.60 | 0.907 | 0.990 | 0.338 | 0.488 | 0.797 | 0.049 |
| <i>Ruminococcaceae_UCG-001</i>       | 0.00 | 0.00 | 0.14 | 0.02 | 0.08 | 0.10 | 0.10 | 0.06 | 0.02 | 0.02 | 0.02 | 0.01 | NA    | 0.161 | 0.739 | 0.435 | 0.894 | 0.519 |
| <i>Ruminococcaceae_UCG-002</i>       | 0.01 | 0.02 | 0.14 | 0.34 | 0.05 | 0.07 | 0.06 | 0.07 | 0.05 | 0.03 | 0.04 | 0.05 | 0.688 | 0.182 | 0.073 | 0.704 | 0.569 | 0.559 |
| <i>Ruminococcaceae_UCG-004</i>       | 0.02 | 0.01 | 0.01 | 0.00 | 0.00 | 0.00 | 0.00 | 0.00 | 0.00 | 0.00 | 0.00 | 0.00 | 0.464 | 0.126 | 0.391 | 0.812 | 0.727 | 0.988 |
| <i>Ruminococcaceae_UCG-005</i>       | 0.00 | 0.02 | 0.16 | 0.09 | 0.12 | 0.10 | 0.12 | 0.07 | 0.05 | 0.07 | 0.14 | 0.09 | 0.471 | 0.168 | 0.335 | 0.184 | 0.481 | 0.207 |
| <i>Ruminococcaceae_UCG-009</i>       | 0.00 | 0.00 | 0.05 | 0.03 | 0.00 | 0.01 | 0.00 | 0.00 | 0.00 | 0.00 | 0.00 | 0.00 | 0.234 | 0.580 | 0.129 | 0.104 | 0.559 | NA    |
| <i>Ruminococcaceae_UCG-010</i>       | 0.00 | 0.00 | 0.35 | 0.14 | 0.29 | 0.23 | 0.19 | 0.36 | 0.56 | 0.40 | 0.82 | 0.59 | 0.136 | 0.173 | 0.469 | 0.281 | 0.141 | 0.071 |
| <i>Ruminococcaceae_UCG-011</i>       | 0.00 | 0.00 | 0.01 | 0.00 | 0.06 | 0.02 | 0.04 | 0.02 | 0.08 | 0.08 | 0.33 | 0.04 | NA    | 0.061 | 0.029 | 0.078 | 0.906 | 0.302 |
| <i>Ruminococcaceae_UCG-012</i>       | 0.00 | 0.00 | 0.01 | 0.02 | 0.01 | 0.01 | 0.03 | 0.02 | 0.08 | 0.07 | 0.06 | 0.03 | NA    | 0.613 | 0.520 | 0.387 | 0.794 | 0.070 |
| <i>Ruminococcaceae_UCG-013</i>       | 0.00 | 0.00 | 0.02 | 0.03 | 0.01 | 0.01 | 0.02 | 0.04 | 0.04 | 0.04 | 0.03 | 0.02 | 0.692 | 0.319 | 0.554 | 0.403 | 0.928 | 0.194 |
| <i>Ruminococcaceae_UCG-014</i>       | 0.01 | 0.00 | 1.43 | 1.15 | 6.06 | 4.57 | 5.38 | 3.74 | 1.78 | 1.83 | 1.19 | 0.53 | 0.260 | 0.658 | 0.087 | 0.039 | 0.948 | 0.004 |
| <i>Ruminococcaceae_V9D2013_group</i> | 0.00 | 0.00 | 0.01 | 0.01 | 0.01 | 0.02 | 0.01 | 0.02 | 0.01 | 0.00 | 0.01 | 0.01 | NA    | 0.772 | 0.838 | 0.120 | 0.791 | 0.668 |
| <i>Ruminococcaceae-F</i>             | 3.68 | 1.29 | 0.27 | 0.23 | 0.61 | 0.58 | 0.39 | 0.44 | 0.20 | 0.26 | 0.18 | 0.14 | 0.442 | 0.300 | 0.830 | 0.610 | 0.358 | 0.379 |
| <i>Ruminococcus_1</i>                | 0.11 | 0.76 | 0.39 | 0.39 | 0.92 | 0.86 | 0.73 | 0.76 | 0.27 | 0.60 | 0.34 | 0.22 | 0.417 | 0.968 | 0.858 | 0.855 | 0.017 | 0.356 |
| <i>Ruminococcus_2</i>                | 0.00 | 0.00 | 0.60 | 0.55 | 0.87 | 0.84 | 0.50 | 0.39 | 0.43 | 0.77 | 0.10 | 0.07 | 0.206 | 0.857 | 0.912 | 0.483 | 0.222 | 0.352 |
| <i>Saccharofermentans</i>            | 0.00 | 0.00 | 1.19 | 0.18 | 1.65 | 1.36 | 1.37 | 1.11 | 0.47 | 0.75 | 1.49 | 1.00 | NA    | 0.036 | 0.736 | 0.383 | 0.149 | 0.381 |
| <i>Schwartzia</i>                    | 0.00 | 0.00 | 0.00 | 0.01 | 0.01 | 0.00 | 0.01 | 0.01 | 0.01 | 0.01 | 0.03 | 0.01 | NA    | 0.762 | 0.347 | 0.788 | 0.515 | 0.038 |
| <i>Selenomonas</i>                   | 0.00 | 0.00 | 0.00 | 0.14 | 0.00 | 0.00 | 0.00 | 0.01 | 0.00 | 0.00 | 0.00 | 0.00 | NA    | 0.098 | 0.304 | 0.464 | NA    | NA    |
| <i>Selenomonas_1</i>                 | 0.00 | 0.00 | 0.06 | 0.08 | 0.21 | 0.28 | 0.19 | 0.15 | 0.16 | 0.13 | 0.21 | 0.08 | 0.435 | 0.736 | 0.433 | 0.464 | 0.587 | 0.126 |
| <i>Sharpea</i>                       | 0.00 | 0.00 | 0.40 | 0.22 | 0.00 | 0.00 | 0.11 | 0.39 | 0.00 | 0.00 | 0.00 | 0.00 | NA    | 0.578 | 0.125 | 0.520 | NA    | NA    |
| <i>Shuttleworthia</i>                | 0.00 | 0.00 | 0.02 | 0.01 | 0.07 | 0.08 | 0.10 | 0.06 | 0.01 | 0.01 | 0.01 | 0.01 | NA    | 0.735 | 0.794 | 0.279 | 0.504 | 0.501 |
| <i>Staphylococcus</i>                | 0.00 | 0.02 | 0.01 | 0.00 | 0.00 | 0.00 | 0.00 | 0.00 | 0.00 | 0.00 | 0.00 | 0.00 | 0.463 | 0.329 | 0.574 | NA    | 0.610 | NA    |
| <i>Streptococcus</i>                 | 1.63 | 1.41 | 0.01 | 0.01 | 0.02 | 0.01 | 0.03 | 0.02 | 0.01 | 0.01 | 0.02 | 0.01 | 0.898 | 0.672 | 0.365 | 0.866 | 0.249 | 0.273 |
| <i>Subdoligranulum</i>               | 0.02 | 0.00 | 0.02 | 0.02 | 0.00 | 0.00 | 0.00 | 0.00 | 0.00 | 0.00 | 0.00 | 0.00 | 0.095 | 0.935 | NA    | NA    | NA    | NA    |

|                                |       |      |       |      |      |      |      |      |      |      |      |      |       |       |       |       |       |       |
|--------------------------------|-------|------|-------|------|------|------|------|------|------|------|------|------|-------|-------|-------|-------|-------|-------|
| <i>Succiniclasticum</i>        | 0.00  | 0.00 | 0.11  | 0.19 | 0.09 | 0.12 | 0.12 | 0.09 | 0.18 | 0.10 | 0.42 | 0.09 | NA    | 0.182 | 0.508 | 0.371 | 0.097 | 0.072 |
| <i>Syntrophococcus</i>         | 0.00  | 0.00 | 0.03  | 0.04 | 0.01 | 0.01 | 0.02 | 0.01 | 0.01 | 0.01 | 0.02 | 0.01 | NA    | 0.745 | 0.384 | 0.105 | 0.634 | 0.116 |
| <i>Tyzzerella</i>              | 0.04  | 0.21 | 0.00  | 0.00 | 0.00 | 0.00 | 0.00 | 0.00 | 0.00 | 0.00 | 0.00 | 0.00 | 0.512 | NA    | NA    | NA    | NA    | NA    |
| <i>Tyzzerella_3</i>            | 0.01  | 0.00 | 0.02  | 0.01 | 0.01 | 0.02 | 0.03 | 0.03 | 0.02 | 0.02 | 0.00 | 0.00 | 0.266 | 0.466 | 0.499 | 0.984 | 0.429 | 0.412 |
| <i>Tyzzerella_4</i>            | 0.01  | 0.05 | 0.00  | 0.00 | 0.00 | 0.00 | 0.00 | 0.00 | 0.00 | 0.00 | 0.00 | 0.00 | 0.517 | 0.276 | NA    | NA    | NA    | 0.362 |
| <i>Veillonella</i>             | 0.03  | 0.06 | 0.00  | 0.00 | 0.00 | 0.00 | 0.00 | 0.00 | 0.00 | 0.00 | 0.00 | 0.00 | 0.485 | 0.105 | NA    | NA    | NA    | NA    |
| <i>Veillonellaceae_UCG-001</i> | 0.00  | 0.00 | 0.01  | 0.01 | 0.02 | 0.01 | 0.02 | 0.01 | 0.03 | 0.02 | 0.09 | 0.03 | NA    | 0.901 | 0.451 | 0.655 | 0.445 | 0.067 |
| Veillonellaceae-F              | 0.00  | 0.00 | 0.01  | 0.02 | 0.04 | 0.03 | 0.08 | 0.05 | 0.00 | 0.01 | 0.01 | 0.01 | NA    | 0.488 | 0.695 | 0.361 | 0.416 | 0.437 |
| Fusobacteria                   | 2.44  | 1.31 | 0.01  | 0.01 | 0.00 | 0.00 | 0.02 | 0.00 | 0.00 | 0.00 | 0.01 | 0.00 | 0.368 | 0.155 | 0.829 | 0.281 | 0.356 | 0.120 |
| <i>Caviibacter</i>             | 0.00  | 0.00 | 0.01  | 0.00 | 0.00 | 0.00 | 0.02 | 0.00 | 0.00 | 0.00 | 0.00 | 0.00 | 0.234 | 0.118 | 0.862 | 0.264 | 0.759 | 0.993 |
| <i>Fusobacterium</i>           | 2.43  | 1.28 | 0.00  | 0.00 | 0.00 | 0.00 | 0.00 | 0.00 | 0.00 | 0.00 | 0.01 | 0.00 | 0.364 | 0.934 | 0.840 | 0.714 | 0.244 | 0.055 |
| <i>Leptotrichia</i>            | 0.01  | 0.03 | 0.00  | 0.00 | 0.00 | 0.00 | 0.00 | 0.00 | 0.00 | 0.00 | 0.00 | 0.00 | 0.594 | 0.450 | NA    | NA    | NA    | 0.304 |
| Lentisphaerae                  | 0.00  | 0.00 | 0.04  | 0.02 | 0.02 | 0.02 | 0.06 | 0.03 | 0.18 | 0.18 | 0.62 | 0.41 | 0.435 | 0.393 | 0.912 | 0.370 | 0.995 | 0.186 |
| Oligosphaeraceae-F             | 0.00  | 0.00 | 0.00  | 0.00 | 0.00 | 0.00 | 0.00 | 0.00 | 0.01 | 0.00 | 0.02 | 0.01 | NA    | NA    | 0.869 | 0.387 | 0.022 | 0.113 |
| vadinBE97-F                    | 0.00  | 0.00 | 0.03  | 0.02 | 0.02 | 0.02 | 0.06 | 0.03 | 0.17 | 0.17 | 0.55 | 0.36 | 0.435 | 0.437 | 0.980 | 0.337 | 0.997 | 0.155 |
| Victivallaceae-F               | 0.00  | 0.00 | 0.00  | 0.00 | 0.00 | 0.00 | 0.00 | 0.00 | 0.01 | 0.02 | 0.04 | 0.05 | NA    | 0.241 | 0.435 | 0.211 | 0.317 | 0.739 |
| Proteobacteria                 | 25.77 | 9.38 | 11.33 | 8.73 | 6.85 | 6.68 | 4.55 | 8.16 | 9.90 | 9.69 | 3.04 | 2.98 | 0.021 | 0.614 | 0.961 | 0.189 | 0.938 | 0.930 |
| <i>Acinetobacter</i>           | 0.23  | 0.03 | 0.00  | 0.00 | 0.00 | 0.00 | 0.00 | 0.00 | 0.00 | 0.00 | 0.00 | 0.00 | 0.035 | 0.500 | 0.310 | 0.276 | NA    | 0.362 |
| <i>Actinobacillus</i>          | 0.25  | 0.36 | 0.00  | 0.00 | 0.00 | 0.00 | 0.00 | 0.00 | 0.00 | 0.00 | 0.00 | 0.00 | 0.719 | 0.981 | NA    | 0.276 | NA    | 0.647 |
| Alphaproteobacteria-C          | 0.01  | 0.00 | 0.02  | 0.01 | 0.04 | 0.09 | 0.04 | 0.07 | 0.14 | 0.13 | 0.03 | 0.02 | 0.397 | 0.233 | 0.221 | 0.237 | 0.886 | 0.492 |
| <i>Alysiella</i>               | 0.02  | 0.01 | 0.00  | 0.00 | 0.00 | 0.00 | 0.00 | 0.00 | 0.00 | 0.00 | 0.00 | 0.00 | 0.059 | 0.244 | NA    | NA    | NA    | NA    |
| Betaproteobacteria-C           | 0.00  | 0.00 | 0.03  | 0.00 | 0.00 | 0.00 | 0.00 | 0.00 | 0.00 | 0.00 | 0.00 | 0.00 | 0.294 | 0.170 | NA    | NA    | NA    | NA    |
| Bradymonadales-O               | 0.00  | 0.00 | 0.00  | 0.02 | 0.01 | 0.00 | 0.01 | 0.00 | 0.00 | 0.01 | 0.00 | 0.01 | NA    | 0.382 | 0.182 | 0.169 | 0.306 | 0.236 |
| <i>Campylobacter</i>           | 0.02  | 0.05 | 0.01  | 0.01 | 0.00 | 0.00 | 0.00 | 0.00 | 0.00 | 0.00 | 0.00 | 0.00 | 0.384 | 0.851 | 0.153 | 0.035 | NA    | NA    |
| Comamonadaceae-F               | 0.08  | 0.02 | 0.00  | 0.00 | 0.00 | 0.00 | 0.00 | 0.00 | 0.00 | 0.00 | 0.00 | 0.00 | 0.138 | 0.276 | NA    | NA    | NA    | NA    |
| <i>Comamonas</i>               | 16.08 | 1.91 | 0.01  | 0.00 | 0.00 | 0.01 | 0.00 | 0.00 | 0.00 | 0.00 | 0.00 | 0.00 | 0.037 | 0.068 | 0.318 | 0.276 | 0.244 | NA    |
| <i>Escherichia-Shigella</i>    | 0.03  | 0.03 | 0.00  | 0.00 | 0.00 | 0.00 | 0.00 | 0.00 | 0.00 | 0.00 | 0.00 | 0.00 | 0.778 | 0.387 | NA    | NA    | NA    | 0.304 |
| <i>Gallibacterium</i>          | 4.85  | 5.58 | 0.00  | 0.00 | 0.00 | 0.00 | 0.00 | 0.00 | 0.00 | 0.00 | 0.00 | 0.00 | 0.749 | 0.387 | NA    | 0.387 | NA    | NA    |
| <i>Mannheimia</i>              | 0.07  | 0.16 | 0.00  | 0.00 | 0.00 | 0.00 | 0.00 | 0.00 | 0.00 | 0.00 | 0.00 | 0.00 | 0.530 | 0.282 | NA    | NA    | NA    | NA    |
| <i>Moraxella</i>               | 0.04  | 0.11 | 0.00  | 0.00 | 0.00 | 0.00 | 0.00 | 0.00 | 0.00 | 0.00 | 0.00 | 0.00 | 0.606 | NA    | NA    | 0.387 | NA    | NA    |
| <i>Neisseria</i>               | 0.06  | 0.07 | 0.00  | 0.00 | 0.00 | 0.00 | 0.00 | 0.00 | 0.00 | 0.00 | 0.00 | 0.00 | 0.746 | NA    | NA    | 0.276 | NA    | NA    |
| Neisseriaceae-F                | 0.07  | 0.08 | 0.02  | 0.04 | 0.00 | 0.00 | 0.00 | 0.00 | 0.00 | 0.00 | 0.00 | 0.00 | 0.940 | 0.441 | NA    | 0.276 | 0.420 | NA    |

|                                    |       |       |       |       |       |       |       |       |       |       |       |       |       |       |       |       |       |       |  |
|------------------------------------|-------|-------|-------|-------|-------|-------|-------|-------|-------|-------|-------|-------|-------|-------|-------|-------|-------|-------|--|
| <i>Parasutterella</i>              | 0.00  | 0.01  | 0.00  | 0.01  | 0.00  | 0.00  | 0.00  | 0.00  | 0.00  | 0.00  | 0.00  | 0.00  | 0.435 | 0.176 | NA    | NA    | NA    | NA    |  |
| Pasteurellaceae-F                  | 0.00  | 0.02  | 0.00  | 0.00  | 0.00  | 0.00  | 0.00  | 0.00  | 0.00  | 0.00  | 0.00  | 0.00  | 0.422 | 0.387 | NA    | NA    | NA    | NA    |  |
| <i>Pseudomonas</i>                 | 0.00  | 0.00  | 0.00  | 0.00  | 0.01  | 0.01  | 0.00  | 0.00  | 0.00  | 0.00  | 0.00  | 0.00  | NA    | 0.276 | 0.663 | 0.783 | NA    | 0.304 |  |
| <i>Psychrobacter</i>               | 0.05  | 0.07  | 0.00  | 0.00  | 0.00  | 0.00  | 0.00  | 0.00  | 0.00  | 0.00  | 0.00  | 0.00  | 0.645 | 0.202 | NA    | 0.276 | NA    | NA    |  |
| Rhodocyclaceae-F                   | 3.90  | 0.82  | 2.45  | 0.41  | 0.01  | 0.01  | 0.02  | 0.00  | 0.00  | 0.00  | 0.00  | 0.00  | 0.365 | 0.327 | 0.521 | 0.011 | 0.033 | 0.583 |  |
| Rhodospirillaceae-F                | 0.00  | 0.00  | 2.95  | 0.59  | 6.10  | 6.33  | 3.12  | 7.49  | 8.86  | 7.92  | 2.81  | 2.70  | 0.234 | 0.101 | 0.948 | 0.122 | 0.723 | 0.873 |  |
| Rickettsiales-O                    | 0.00  | 0.00  | 0.00  | 0.00  | 0.02  | 0.01  | 0.00  | 0.08  | 0.11  | 0.08  | 0.11  | 0.11  | NA    | 0.906 | 0.896 | 0.281 | 0.478 | 0.985 |  |
| <i>Ruminobacter</i>                | 0.00  | 0.00  | 0.04  | 0.05  | 0.01  | 0.03  | 0.01  | 0.10  | 0.10  | 0.06  | 0.02  | 0.03  | NA    | 0.790 | 0.095 | 0.354 | 0.493 | 0.175 |  |
| <i>Sphingomonas</i>                | 0.00  | 0.00  | 0.00  | 0.00  | 0.00  | 0.00  | 0.01  | 0.00  | 0.00  | 0.00  | 0.01  | 0.02  | 0.234 | 0.105 | NA    | 0.368 | 0.233 | 0.280 |  |
| <i>Stenotrophomonas</i>            | 0.00  | 0.00  | 0.00  | 0.00  | 0.01  | 0.01  | 0.00  | 0.00  | 0.00  | 0.00  | 0.00  | 0.00  | NA    | 0.116 | 0.267 | 0.387 | 0.420 | 0.757 |  |
| <i>Succinimonas</i>                | 0.00  | 0.00  | 0.00  | 0.00  | 0.01  | 0.01  | 0.64  | 0.01  | 0.01  | 0.01  | 0.00  | 0.02  | NA    | 0.276 | 0.724 | 0.281 | 0.972 | 0.042 |  |
| <i>Succinivibrio</i>               | 0.00  | 0.01  | 5.62  | 6.13  | 0.00  | 0.01  | 0.01  | 0.02  | 0.01  | 0.14  | 0.02  | 0.01  | 0.349 | 0.907 | 0.084 | 0.568 | 0.378 | 0.704 |  |
| <i>Succinivibrionaceae_UCG-001</i> | 0.00  | 0.00  | 0.04  | 0.06  | 0.56  | 0.03  | 0.59  | 0.23  | 0.00  | 0.41  | 0.00  | 0.00  | NA    | 0.804 | 0.096 | 0.251 | 0.395 | NA    |  |
| <i>Succinivibrionaceae_UCG-002</i> | 0.00  | 0.00  | 0.02  | 0.64  | 0.07  | 0.06  | 0.07  | 0.10  | 0.64  | 0.91  | 0.01  | 0.02  | NA    | 0.392 | 0.747 | 0.580 | 0.749 | 0.644 |  |
| Succinivibrionaceae-F              | 0.00  | 0.00  | 0.07  | 0.76  | 0.00  | 0.00  | 0.00  | 0.04  | 0.00  | 0.00  | 0.00  | 0.00  | 0.435 | 0.284 | NA    | 0.407 | NA    | NA    |  |
| <i>Sutterella</i>                  | 0.00  | 0.05  | 0.00  | 0.01  | 0.00  | 0.03  | 0.00  | 0.01  | 0.01  | 0.00  | 0.00  | 0.01  | 0.260 | 0.481 | 0.091 | 0.927 | 0.330 | 0.602 |  |
| Saccharibacteria                   | 0.00  | 0.00  | 0.00  | 0.00  | 0.05  | 0.04  | 0.09  | 0.03  | 0.06  | 0.05  | 0.07  | 0.03  | NA    | 0.784 | 0.556 | 0.025 | 0.359 | 0.060 |  |
| Spirochaetae                       | 1.41  | 4.90  | 3.75  | 5.64  | 1.92  | 2.60  | 4.86  | 5.19  | 4.66  | 4.52  | 4.52  | 4.24  | 0.510 | 0.521 | 0.067 | 0.814 | 0.910 | 0.841 |  |
| <i>Sphaerochaeta</i>               | 0.02  | 0.80  | 0.28  | 2.30  | 0.09  | 0.14  | 0.08  | 0.17  | 0.19  | 0.14  | 0.38  | 0.25  | 0.436 | 0.125 | 0.458 | 0.328 | 0.264 | 0.012 |  |
| <i>Spirochaeta_2</i>               | 0.00  | 0.00  | 0.01  | 0.00  | 0.01  | 0.00  | 0.00  | 0.00  | 0.03  | 0.02  | 0.03  | 0.02  | NA    | 0.223 | 0.125 | 0.698 | 0.521 | 0.258 |  |
| Spirochaetaceae-F                  | 0.00  | 0.00  | 0.02  | 0.00  | 0.00  | 0.01  | 0.00  | 0.00  | 0.05  | 0.02  | 0.01  | 0.01  | NA    | 0.276 | 0.212 | 0.214 | 0.294 | 0.482 |  |
| <i>Treponema</i>                   | 1.39  | 4.10  | 3.44  | 3.34  | 1.82  | 2.46  | 4.78  | 5.02  | 4.40  | 4.34  | 4.10  | 3.96  | 0.608 | 0.970 | 0.101 | 0.860 | 0.963 | 0.924 |  |
| Tenericutes                        | 0.18  | 0.02  | 0.52  | 0.40  | 1.55  | 1.35  | 1.52  | 1.22  | 1.70  | 1.14  | 1.83  | 1.57  | 0.071 | 0.423 | 0.465 | 0.314 | 0.080 | 0.351 |  |
| Anaeroplasma                       | 0.06  | 0.00  | 0.09  | 0.09  | 0.34  | 0.16  | 0.39  | 0.30  | 0.84  | 0.47  | 0.65  | 0.88  | 0.237 | 0.933 | 0.045 | 0.251 | 0.018 | 0.173 |  |
| Mollicutes-C                       | 0.12  | 0.01  | 0.43  | 0.31  | 1.20  | 1.19  | 1.13  | 0.93  | 0.87  | 0.67  | 1.19  | 0.69  | 0.133 | 0.338 | 0.935 | 0.396 | 0.329 | 0.010 |  |
| Verrucomicrobia                    | 0.00  | 0.00  | 0.02  | 0.00  | 0.00  | 0.00  | 0.00  | 0.00  | 0.08  | 0.02  | 0.02  | 0.02  | 0.173 | 0.300 | 0.697 | 0.950 | 0.159 | 0.904 |  |
| <b>Anaerobic Fungi</b>             |       |       |       |       |       |       |       |       |       |       |       |       |       |       |       |       |       |       |  |
| <i>Anaeromyces</i>                 | 0.00  | 15.98 | 0.00  | 0.16  | 0.00  | 0.00  | 0.00  | 0.00  | 0.00  | 0.00  | 23.59 | 4.73  | 0.356 | 0.335 | NA    | NA    | NA    | 0.670 |  |
| <i>Caecomycetes</i>                | 34.67 | 24.97 | 59.78 | 77.99 | 67.88 | 64.29 | 86.95 | 70.85 | 27.34 | 25.82 | 14.62 | 12.82 | 0.738 | 0.191 | 0.783 | 0.209 | 0.856 | 0.614 |  |
| <i>Cyllamyces</i>                  | 0.00  | 0.00  | 0.15  | 1.64  | 0.00  | 4.17  | 0.00  | 5.62  | 29.70 | 30.06 | 8.48  | 17.14 | NA    | 0.165 | 0.362 | 0.387 | 0.977 | 0.513 |  |
| <i>Neocallimastigaceae-F</i>       | 17.19 | 58.22 | 36.04 | 15.15 | 21.37 | 13.27 | 6.12  | 18.97 | 38.56 | 36.57 | 19.79 | 17.95 | 0.194 | 0.083 | 0.404 | 0.293 | 0.778 | 0.262 |  |

|                       |       |      |      |      |       |       |      |      |       |       |       |       |       |       |       |       |       |       |  |
|-----------------------|-------|------|------|------|-------|-------|------|------|-------|-------|-------|-------|-------|-------|-------|-------|-------|-------|--|
| <i>Neocallimastix</i> | 23.61 | 0.00 | 0.07 | 0.40 | 0.00  | 0.01  | 0.11 | 0.01 | 0.74  | 0.83  | 0.86  | 0.70  | 0.356 | 0.370 | 0.185 | 0.289 | 0.867 | 0.613 |  |
| <i>Orpinomyces</i>    | 0.00  | 0.00 | 0.00 | 0.01 | 0.00  | 0.00  | 0.00 | 0.00 | 0.00  | 0.51  | 26.20 | 40.74 | NA    | 0.396 | NA    | NA    | 0.420 | 0.876 |  |
| <i>Piromyces</i>      | 24.53 | 0.83 | 3.95 | 4.66 | 10.75 | 18.26 | 6.82 | 4.54 | 3.66  | 6.21  | 6.47  | 5.92  | 0.370 | 0.840 | 0.526 | 0.494 | 0.527 | 0.178 |  |
| <b>Protozoa</b>       |       |      |      |      |       |       |      |      |       |       |       |       |       |       |       |       |       |       |  |
| <i>Dasytricha</i>     | -     | -    | -    | -    | -     | -     | -    | -    | 5.82  | 0.14  | 5.79  | 5.36  | -     | -     | -     | -     | 0.172 | 0.883 |  |
| <i>Diplodinium</i>    | -     | -    | -    | -    | -     | -     | -    | -    | 0.88  | 4.32  | 9.19  | 14.52 | -     | -     | -     | -     | 0.187 | 0.092 |  |
| <i>Entodinium</i>     | -     | -    | -    | -    | -     | -     | -    | -    | 88.70 | 94.34 | 33.05 | 40.10 | -     | -     | -     | -     | 0.257 | 0.308 |  |
| <i>Eremoplastron</i>  | -     | -    | -    | -    | -     | -     | -    | -    | 0.16  | 0.70  | 1.87  | 1.64  | -     | -     | -     | -     | 0.498 | 0.806 |  |
| <i>Eudiplodinium</i>  | -     | -    | -    | -    | -     | -     | -    | -    | 0.02  | 0.02  | 6.26  | 6.69  | -     | -     | -     | -     | 0.405 | 0.893 |  |
| <i>Isotricha</i>      | -     | -    | -    | -    | -     | -     | -    | -    | 0.00  | 0.00  | 5.14  | 3.83  | -     | -     | -     | -     | 0.861 | 0.555 |  |
| <i>Ophryoscolex</i>   | -     | -    | -    | -    | -     | -     | -    | -    | 3.61  | 0.18  | 19.56 | 12.77 | -     | -     | -     | -     | 0.036 | 0.222 |  |
| <i>Polyplastron</i>   | -     | -    | -    | -    | -     | -     | -    | -    | 0.35  | 0.15  | 3.08  | 3.34  | -     | -     | -     | -     | 0.098 | 0.825 |  |
| Trichostomatia -C     | -     | -    | -    | -    | -     | -     | -    | -    | 0.46  | 0.15  | 16.06 | 11.75 | -     | -     | -     | -     | 0.023 | 0.100 |  |

Taxa are presented at the highest taxonomic level at which they were classified, F- family, O- order, C-class; P-values represent pairwise comparisons between CONT and 3NOP, within each week. Only taxa that were present at >0.01 in at least one group in a least one week are shown.

<sup>1</sup> n=6 in CONT; n=9 in 3-NOP

<sup>2</sup> n=8 in CONT; n=10 in 3-NOP

<sup>3</sup> n=8 in CONT; n=9 in 3-NOP

<sup>4</sup> n=7 in CONT; n=10 in 3-NOP

Table S7. Protozoa concentration in the rumen fluid of calves at 60 weeks of age as affected by dietary supplementation of 3-NOP.

|                                             | CONT | 3NOP | SEM   | P-value |
|---------------------------------------------|------|------|-------|---------|
| Total protozoa, log <sub>10</sub> cells/mL  | 4.96 | 4.96 | 0.076 | 0.98    |
| Entodiniomorphs, log <sub>10</sub> cells/mL |      |      |       |         |
| Small (<100 µm)                             | 4.92 | 4.93 | 0.077 | 0.92    |
| Large (>100 µm)                             | 3.64 | 3.48 | 0.173 | 0.36    |
| Holotrichs, log <sub>10</sub> cells/mL      |      |      |       |         |
| Dasytricha                                  | 3.11 | 3.20 | 0.165 | 0.58    |
| Isotricha                                   | 2.54 | 2.51 | 0.270 | 0.93    |

N= 8 in CONT; n= 9 in 3-NOP



**Table S8.** Relative abundance of faecal taxa in calves aged 1, 4, 11, 14, 23, and 60 weeks, as affected by dietary supplementation of 3-NOP.

| Taxa                                                    | Week 1 <sup>1</sup> |       | Week 4 <sup>2</sup> |       | Week 11 <sup>2</sup> |       | Week 14 <sup>3</sup> |       | Week 23 <sup>4</sup> |       | Week 60 <sup>2</sup> |       | P-value |       |       |       |       |       |
|---------------------------------------------------------|---------------------|-------|---------------------|-------|----------------------|-------|----------------------|-------|----------------------|-------|----------------------|-------|---------|-------|-------|-------|-------|-------|
|                                                         | CONT                | 3NOP  | CONT                | 3NOP  | CONT                 | 3NOP  | CONT                 | 3NOP  | CONT                 | 3NOP  | CONT                 | 3NOP  | 1       | 4     | 11    | 14    | 23    | 60    |
| <b>Archaea</b>                                          |                     |       |                     |       |                      |       |                      |       |                      |       |                      |       |         |       |       |       |       |       |
| Archaea unclassified                                    | 63.91               | 81.77 | 41.85               | 78.45 | 42.30                | 14.83 | 26.27                | 13.77 | 16.61                | 18.49 | 13.91                | 15.60 | 0.54    | 0.016 | 0.009 | 0.061 | 0.70  | 0.23  |
| Euryarchaeota unclassified                              | 20.94               | 17.99 | 21.99               | 14.90 | 26.12                | 62.96 | 33.25                | 73.13 | 41.10                | 52.77 | 45.00                | 49.27 | 0.92    | 0.52  | 0.019 | 0.001 | 0.068 | 0.21  |
| <i>Methanobrevibacter_boviskoreani_c</i><br><i>lade</i> | 0.00                | 0.00  | 0.00                | 0.00  | 0.00                 | 0.00  | 0.00                 | 0.00  | 0.00                 | 0.00  | 0.00                 | 0.04  | NA      | NA    | NA    | NA    | NA    | 0.36  |
| <i>Methanobrevibacter_gottschalkii_cl</i><br><i>ade</i> | 15.07               | 0.01  | 18.12               | 0.68  | 16.31                | 10.75 | 12.96                | 3.83  | 19.46                | 11.89 | 16.52                | 13.65 | 0.22    | 0.016 | 0.47  | 0.014 | 0.13  | 0.38  |
| <i>Methanobrevibacter_oralis</i>                        | 0.02                | 0.00  | 0.00                | 0.00  | 0.02                 | 0.00  | 0.00                 | 0.00  | 0.01                 | 0.01  | 0.05                 | 0.03  | 0.22    | 0.33  | 0.28  | 0.41  | 0.97  | 0.43  |
| <i>Methanobrevibacter_ruminantium_c</i><br><i>lade</i>  | 0.04                | 0.00  | 5.09                | 0.24  | 3.73                 | 8.86  | 15.64                | 3.68  | 6.31                 | 5.61  | 10.11                | 5.71  | 0.22    | 0.17  | 0.28  | 0.006 | 0.64  | 0.021 |
| <i>Methanobrevibacter_smithii</i>                       | 0.00                | 0.00  | 0.00                | 0.00  | 0.00                 | 0.00  | 0.00                 | 0.00  | 0.00                 | 0.00  | 0.00                 | 0.00  | NA      | NA    | NA    | 0.41  | 0.97  | NA    |
| <i>Methanobrevibacter_unclassified</i>                  | 0.02                | 0.02  | 0.02                | 0.01  | 0.04                 | 0.03  | 0.04                 | 0.32  | 0.62                 | 0.38  | 0.65                 | 0.98  | 0.81    | 0.43  | 0.70  | 0.20  | 0.49  | 0.42  |
| <i>Methanosphaera</i>                                   | 0.00                | 0.00  | 2.57                | 1.52  | 2.08                 | 0.81  | 7.34                 | 1.56  | 1.29                 | 0.68  | 0.58                 | 0.26  | NA      | 0.72  | 0.25  | 0.094 | 0.33  | 0.17  |
| Methanococcales-o                                       | 0.00                | 0.02  | 7.24                | 0.00  | 8.54                 | 1.42  | 4.48                 | 3.03  | 4.99                 | 3.43  | 4.59                 | 3.97  | 0.48    | 0.33  | 0.18  | 0.57  | 0.40  | 0.42  |
| <i>Methanomassiliicoccaceae_Group10</i>                 | 0.00                | 0.00  | 0.00                | 0.00  | 0.00                 | 0.00  | 0.00                 | 0.00  | 0.00                 | 0.00  | 0.00                 | 0.00  | NA      | NA    | NA    | NA    | 0.39  | 0.30  |
| <i>Methanomassiliicoccaceae_Group11</i>                 | 0.00                | 0.00  | 0.00                | 0.00  | 0.00                 | 0.00  | 0.00                 | 0.00  | 0.00                 | 0.00  | 0.00                 | 0.00  | NA      | NA    | NA    | NA    | 0.53  | NA    |
| <i>Methanomassiliicoccaceae_Group12</i>                 | 0.00                | 0.00  | 0.01                | 0.03  | 0.01                 | 0.00  | 0.00                 | 0.00  | 0.00                 | 0.00  | 0.00                 | 0.00  | 0.482   | 0.37  | 0.37  | 0.41  | NA    | 0.11  |
| <i>Methanomassiliicoccaceae_Group3</i>                  | 0.00                | 0.00  | 0.00                | 0.00  | 0.00                 | 0.00  | 0.00                 | 0.00  | 0.03                 | 0.01  | 0.04                 | 0.05  | NA      | NA    | NA    | NA    | 0.046 | 0.71  |
| <i>Methanomassiliicoccaceae_Group8</i>                  | 0.00                | 0.18  | 0.00                | 0.00  | 0.02                 | 0.32  | 0.00                 | 0.38  | 5.04                 | 3.55  | 2.73                 | 3.14  | 0.48    | NA    | 0.38  | 0.28  | 0.44  | 0.68  |
| <i>Methanomassiliicoccaceae_Group9</i>                  | 0.00                | 0.00  | 0.00                | 0.00  | 0.01                 | 0.01  | 0.00                 | 0.00  | 3.32                 | 2.09  | 4.39                 | 5.15  | NA      | NA    | 0.98  | NA    | 0.33  | 0.51  |
| <i>Methanomassiliicoccaceae_unclasifi</i><br><i>ed</i>  | 0.00                | 0.00  | 3.11                | 4.17  | 0.83                 | 0.00  | 0.02                 | 0.01  | 0.60                 | 0.42  | 0.82                 | 0.93  | NA      | 0.77  | 0.30  | 0.56  | 0.50  | 0.54  |
| <b>Bacteria</b>                                         |                     |       |                     |       |                      |       |                      |       |                      |       |                      |       |         |       |       |       |       |       |
| Bacteria_unclassified                                   | 0.16                | 0.07  | 0.01                | 0.05  | 0.01                 | 0.01  | 0.01                 | 0.01  | 0.06                 | 0.05  | 0.10                 | 0.08  | 0.59    | 0.044 | 0.89  | 0.33  | 0.21  | 0.50  |
| Actinobacteria                                          | 12.07               | 7.22  | 0.21                | 0.08  | 0.07                 | 0.03  | 0.05                 | 0.05  | 0.09                 | 0.10  | 0.10                 | 0.07  | 0.60    | 0.30  | 0.39  | 0.98  | 0.70  | 0.85  |
| Bacteroidetes                                           | 37.54               | 28.97 | 58.99               | 41.58 | 44.66                | 43.75 | 49.06                | 46.28 | 44.28                | 40.14 | 41.80                | 39.91 | 0.52    | 0.059 | 0.79  | 0.48  | 0.037 | 0.48  |
| Cyanobacteria                                           | 0.00                | 0.00  | 1.11                | 0.15  | 0.79                 | 1.08  | 0.08                 | 0.08  | 0.57                 | 0.76  | 0.32                 | 0.41  | NA      | 0.22  | 0.56  | 0.96  | 0.44  | 0.22  |
| Elusimicrobia                                           | 0.00                | 0.00  | 0.00                | 0.00  | 0.06                 | 0.04  | 0.01                 | 0.01  | 0.01                 | 0.01  | 0.02                 | 0.04  | NA      | 0.13  | 0.59  | 0.74  | 0.64  | 0.16  |

|                              |       |       |       |       |       |       |       |       |       |       |       |       |       |       |       |       |       |       |  |
|------------------------------|-------|-------|-------|-------|-------|-------|-------|-------|-------|-------|-------|-------|-------|-------|-------|-------|-------|-------|--|
| Fibrobacteres                | 0.00  | 0.00  | 0.00  | 0.00  | 0.40  | 0.00  | 0.00  | 0.00  | 0.01  | 0.02  | 0.00  | 0.00  | NA    | NA    | 0.31  | 0.83  | 0.50  | NA    |  |
| Firmicutes                   | 38.65 | 29.36 | 34.55 | 30.86 | 50.78 | 52.63 | 44.34 | 49.64 | 52.73 | 56.44 | 55.09 | 57.38 | 0.425 | 0.52  | 0.51  | 0.097 | 0.067 | 0.49  |  |
| Fusobacteria                 | 0.22  | 9.62  | 1.30  | 19.06 | 0.00  | 0.00  | 0.00  | 0.00  | 0.00  | 0.00  | 0.00  | 0.00  | 0.15  | 0.027 | 0.36  | NA    | NA    | NA    |  |
| Lentisphaerae                | 0.00  | 0.00  | 0.00  | 0.00  | 0.00  | 0.01  | 0.00  | 0.00  | 0.02  | 0.04  | 0.08  | 0.11  | NA    | NA    | 0.37  | 0.58  | 0.15  | 0.46  |  |
| Proteobacteria               | 11.22 | 24.74 | 2.91  | 8.07  | 0.87  | 0.89  | 0.51  | 0.86  | 0.68  | 0.79  | 0.37  | 0.44  | 0.16  | 0.006 | 0.96  | 0.46  | 0.66  | 0.75  |  |
| Saccharibacteria             | 0.00  | 0.00  | 0.00  | 0.00  | 0.01  | 0.00  | 0.01  | 0.01  | 0.01  | 0.02  | 0.02  | 0.01  | NA    | 0.30  | 0.61  | 0.84  | 0.17  | 0.052 |  |
| Spirochaetae                 | 0.00  | 0.00  | 0.00  | 0.00  | 1.55  | 0.86  | 5.47  | 2.33  | 0.87  | 0.83  | 1.66  | 1.07  | NA    | NA    | 0.33  | 0.12  | 0.82  | 0.68  |  |
| Tenericutes                  | 0.15  | 0.00  | 0.92  | 0.15  | 0.80  | 0.56  | 0.45  | 0.69  | 0.65  | 0.78  | 0.40  | 0.41  | 0.48  | 0.070 | 0.49  | 0.16  | 0.28  | 0.67  |  |
| Verrucomicrobia              | 0.00  | 0.00  | 0.00  | 0.00  | 0.00  | 0.15  | 0.00  | 0.02  | 0.01  | 0.03  | 0.05  | 0.07  | NA    | NA    | 0.097 | 0.16  | 0.13  | 0.55  |  |
| <b>Anaerobic Fungi</b>       |       |       |       |       |       |       |       |       |       |       |       |       |       |       |       |       |       |       |  |
| <i>Anaeromyces</i>           | -     | -     | -     | -     | 0.00  | 0.00  | 0.00  | 0.00  | 0.00  | 0.00  | 0.00  | 3.34  | -     | -     | NA    | NA    | NA    | 0.19  |  |
| <i>Caecomycetes</i>          | -     | -     | -     | -     | 19.77 | 22.19 | 49.75 | 75.64 | 64.01 | 43.09 | 33.35 | 39.86 | -     | -     | 0.93  | 0.41  | 0.12  | 0.58  |  |
| <i>Cyllamyces</i>            | -     | -     | -     | -     | 0.00  | 0.00  | 0.00  | 0.00  | 9.40  | 28.36 | 18.24 | 9.82  | -     | -     | NA    | NA    | 0.13  | 0.34  |  |
| <i>Neocallimastix</i>        | -     | -     | -     | -     | 0.00  | 0.00  | 0.00  | 0.00  | 0.04  | 0.00  | 0.01  | 0.03  | -     | -     | NA    | NA    | 0.30  | 0.25  |  |
| <i>Orpinomyces</i>           | -     | -     | -     | -     | 0.00  | 0.00  | 0.00  | 0.01  | 0.00  | 0.00  | 1.25  | 0.76  | -     | -     | MA    | 0.45  | NA    | 0.65  |  |
| <i>Piromyces</i>             | -     | -     | -     | -     | 0.00  | 0.31  | 0.00  | 0.36  | 0.53  | 0.51  | 1.54  | 3.29  | -     | -     | 0.39  | 0.24  | 0.97  | 0.31  |  |
| <i>Neocallimastigaceae-F</i> | -     | -     | -     | -     | 80.23 | 77.49 | 50.25 | 24.00 | 26.03 | 28.04 | 4.19  | 6.25  | -     | -     | 0.91  | 0.41  | 0.86  | 0.36  |  |

<sup>1</sup> n=6 in CONT; n=9 in 3-NOP

<sup>2</sup> n=8 in CONT; n=9 in 3-NOP

<sup>3</sup> n=6 in CONT; n=9 in 3-NOP

<sup>4</sup> n=8 in CONT; n=10 in 3-NOP

**Table S9.** Discriminant plasma metabolites identified by untargeted LC-ToF/MS in 14 weeks old calves, as affected by dietary supplementation of 3-NOP

| Metabolite          | VIP  | Rt<br>(min) | FC <sup>1</sup> | P-<br>value | ID<br>level <sup>2</sup> | Ion species            | Exact<br>mass | Formula         | $\Delta m/z^3$<br>(ppm) |
|---------------------|------|-------------|-----------------|-------------|--------------------------|------------------------|---------------|-----------------|-------------------------|
| Methionine          | 2.47 | 3.5         | 0.84            | 0.024       | 1                        | [M+H] <sup>+</sup>     | 150.0586      | C5 H12 O2 N S   | 1.840                   |
| Leu/isol            | 6.96 | 3.6         | 0.93            | 0.082       | 1                        | [M+H] <sup>+</sup>     | 132.1020      | C6 H14 O2 N     | 0.940                   |
| Tyrosine            | 2.31 | 3.6         | 0.87            | 0.020       | 1                        | [M+H] <sup>+</sup>     | 182.0812      | C9 H12 O3 N     | 0.410                   |
| Phenylalanine       | 2.16 | 9.7         | 0.94            | 0.056       | 1                        | [M+H] <sup>+</sup>     | 166.0862      | C9 H12 O2 N     | -0.070                  |
| Tryptophane         | 3.14 | 10.3        | 0.89            | 0.151       | 2                        | [M+H] <sup>+</sup>     | 205.0969      | C11 H13 O2 N2   | -1.191                  |
| Glycocholic<br>acid | 6.34 | 13.3        | 0.49            | 0.076       | 2*                       | [M+H] <sup>+</sup>     | 466.3160      | C26 H44 O6 N    | -0.696                  |
|                     | 1.22 | 13.3        | 0.36            | 0.082       |                          | [M+NH4] <sup>+</sup>   | 483.3430      | C26 H47 O6 N2   | 0.365                   |
|                     | 1.65 | 13.3        | 0.50            | 0.088       |                          | [M+Na] <sup>+</sup>    | 488.2979      | C26 H43 O6 N Na | -0.838                  |
|                     | 3.59 | 14.4        | 0.56            | 0.014       |                          | [M+H-3H2O]             | 355.2626      | C24 H35 O2      | -1.624                  |
|                     | 6.38 | 14.4        | 0.54            | 0.015       |                          | [M+H-2H2O]             | 373.2732      | C24 H37 O3      | -1.504                  |
|                     | 2.45 | 14.4        | 0.54            | 0.015       |                          | [M-H2O+H] <sup>+</sup> | 391.2836      | C24 H39 O4      | -1.549                  |
|                     | 1.00 | 14.4        | 0.67            | 0.133       |                          | [M+NH4]                | 426.3209      | C24 H44 O5 N    | -1.290                  |
| Cholic acid         | 1.94 | 14.4        | 0.62            | 0.022       | 2*                       | [M+Na]                 | 431.2764      | C24 H40 O5 Na   | -1.010                  |
| Lyso PC(16:1)       | 1.13 | 15.6        | 0.82            | 0.217       | 2                        | [M+H] <sup>+</sup>     | 494.3239      | C24 H49 O7 N P  | -0.436                  |
| Lyso PE(18:2)       | 1.76 | 15.9        | 0.76            | 0.052       | 2                        | [M+H] <sup>+</sup>     | 478.2925      | C23 H45 O7 N P  | -0.660                  |

<sup>1</sup> Fold change ratio of the average value of treated to that of control.

<sup>2</sup> Identification level: 1 based on retention time, accurate mass and fragmentation pattern compared to analytical standard; 2 obtained by querying in-house database: based on retention time and accurate mass match, and for 2\* also adducts pattern.

<sup>3</sup> Mass error, measured relatively to the theoretical exact mass.
